1

1 **Temporary prey storage along swarm columns of army ants: an adaptive strategy for**  
2 **successful raiding?**

3 Hilário Póvoas de Lima<sup>1,2,†\*</sup>, Serafino Teseo<sup>3\*</sup>, Raquel Leite Castro de Lima<sup>1,2</sup>, Ronara Souza

4 Ferreira-Châline<sup>1,2</sup>, Nicolas Châline<sup>1,2</sup>

5 <sup>1</sup>LEEEIS, Laboratory of Ethology, Ecology and Evolution of Insect Societies, Departamento de

6 Psicologia Experimental, Instituto de Psicologia Experimental, Universidade de São Paulo, São Paulo,

7 SP, Brazil

8 <sup>2</sup>Programa de pós-graduação em Psicologia Experimental, USP, São Paulo, SP, Brazil

9 <sup>3</sup>School of Biological Sciences, Nanyang Technological University, Singapore

10 \* These authors contributed equally

11 <sup>†</sup> To whom correspondence should be addressed

12 **Keywords:** army ants, *Eciton*, foraging, collective behavior, column raid, cache

2

## 13      **Abstract**

14      While pillaging the brood of other ant colonies, *Eciton* army ants accumulate prey in piles, or  
15      caches, along their foraging trails. Widely documented, these structures have historically been  
16      considered as byproducts of heavy traffic or aborted relocations of the ants' temporary nest, or  
17      bivouac. However, we recently observed that caches of the hook-jawed army ant, *Eciton*  
18      *hamatum*, appeared independently from heavy traffic or bivouac relocations. In addition, the  
19      flow of prey through caches varied based on the quantity of prey items workers transported. As  
20      this suggested a potential adaptive function, we developed agent-based simulations to compare  
21      raids of caching and non-caching virtual army ants. We found that caches increased the amount  
22      of prey that relatively low numbers of raiders were able to retrieve. However, this advantage  
23      became less conspicuous - and generally disappeared - as the number of raiders increased. Based  
24      on these results, we hypothesize that caches maximize the amount of prey that limited amounts  
25      of raiders can retrieve, especially as prey colonies coordinately evacuate their brood. In principle,  
26      caches also allow workers to safely collect multiple prey items and efficiently transport them to  
27      the bivouac. Further field observations are needed to test this and other hypotheses emerging  
28      from our study.

## 29 **Background**

30 In army ants, foraging occurs through the formation of huge columns of workers roaming  
31 forest floors and raiding other social insect colonies [1,2]. During raids, colonies of the hook-  
32 jawed army ant, *Eciton hamatum*, accumulate brood prey in caches along their columns (Figure  
33 1A). Pioneer army ant scientists attributed this behavior to traffic management inefficiencies.  
34 Schneirla, for example, noticed that numerous workers swarming from the bivouac towards the  
35 foraging fronts prevented prey-carrying foragers from returning, ‘virtually forcing’ them ‘to  
36 deposit their burdens in piles that form near the places of greatest confusion’ [3]. Rettenmeyer  
37 later suggested that caches emerge as prey-carrying workers gather in ‘areas of greater booty  
38 odor’, eventually leading to the formation of new bivouacs if caches become especially large [4].  
39 His observations implied that caches are by-products of bivouac regular relocation.

40 Observing the foraging activity of *E. hamatum*, we noticed that caches appeared regularly  
41 even at low traffic intensities and at times of the day in which colonies do not usually relocate,  
42 raising doubts about the hypothesis that caches exclusively emerge as byproducts. This idea was  
43 corroborated by other experimental work on *Atta* leaf-cutting ants, which also transport huge  
44 food quantities along long trails, showing that leaf fragment caches emerge at nest entrances  
45 when food inflow exceeds processing rates, and reduce the costs of vertical transport [5,6]. As  
46 *Atta* workers maximize food collection via unloading at caches and rapidly resuming foraging,  
47 we hypothesized that *E. hamatum* caches may similarly serve to maximize prey retrieval.  
48 Therefore, after measuring ant traffic and prey transport through caches in natural conditions, we  
49 explored this hypothesis using agent-based simulations, aiming to determine whether and how  
50 caches provide a selective advantage.

## 51      **Results and discussion**

52      Prior to field observations, we defined caches as structures including stacked prey brood,  
53 stationary *E. hamatum* workers (Figure 1A, B, C, video S1) and approaching/leaving individuals.  
54 Then, following foraging columns, we found ten caches, six of which included  $116 \pm 130.56$  prey  
55 items (total=697; min=18; max=296; all ants, mainly *Pheidole* and *Linepithema*; Figure S1,  
56 Tables S1, S2; Supplementary Material text). We found no bivouacs in the surrounding 10m  
57 radius. As we conducted observations between 8:00 am and 4:30 pm, we concluded that the  
58 observed caches did not originate from traffic bottlenecks or aborted bivouacs, which instead  
59 emerge immediately before sunset [3].

60      Analyzing videos of ant traffic through caches (Figure 1D), we counted  $189.8 \pm 117.4$  workers  
61 going from the bivouac to the foraging fronts and  $226.1 \pm 116.3$  workers in the opposite direction,  
62 transporting  $75 \pm 71.9$  prey items. We found no significant differences between the numbers of  
63 workers in the video frame portion including the stretch between the foraging front and the cache  
64 (FC), and that between the cache and the bivouac (CB), for individuals traveling from the  
65 foraging front to the bivouac ( $t=16$ ,  $p=0.24$ ), in the opposite direction ( $t=27$ ,  $p=0.95$ ) and in both  
66 directions pooled ( $U=33.50$ ,  $p=0.21$ ). At caches, we recorded more prey loads passing through  
67 FC than CB ( $t=6.0$ ;  $p=0.05$ , Figure 1E) and more workers carrying single-item prey loads in  
68 FC than CB ( $57.2 \pm 63.2$  vs.  $35.6 \pm 54.5$ ;  $t=8.0$ ;  $n=10$ ,  $p=0.04$ , Figure 1F). The numbers of workers  
69 carrying multiple-item prey loads did not differ significantly (FC:  $8.9 \pm 8.8$ ; BC:  $7.6 \pm 10.9$ ;  $t=13.5$ ;  
70  $p=0.52$ , Figure 1G). This indicated that, at caches, ants accumulated single-prey loads, whereas  
71 multiple-prey loads, although arriving at caches in significantly lower numbers ( $8.9 \pm 8.8$   
72 compared to  $57.2 \pm 63.2$  single-prey loads,  $U=75.5$ ,  $p < 0.05$ ), flowed relatively regularly. We  
73 found no differences between the numbers of unloaded workers in FC and BC ( $151.4 \pm 161.9$  vs.

5

74 116.5±120.8; t=11; p=0.09, Figure 1H). If caches only emerged as by-products, we would not  
75 expect prey accumulation/transport to depend on load size. We therefore suspected that, similar  
76 to the caches of leaf cutting ants [5,6], *E. hamatum*'s caches may serve to optimize colony-level  
77 foraging investments. We hypothesized that caches may emerge as raiders returning from  
78 foraging fronts drop single-prey loads in safe locations, and rapidly return to foraging fronts.  
79 From a colony-level perspective, short sequential trips between caches and foraging fronts would  
80 maximize prey yields at limited numbers of raiders, especially because prey colonies  
81 coordinately evacuate their brood [7,8]. In addition, in the chaos of raids, rapidly retrieving  
82 single prey items may be safer and more convenient than sequentially collecting multiple prey  
83 items. On the other hand, workers at caches could invest time in loading multiple items in a  
84 significantly safer microenvironment, minimizing the distance walked per retrieved food mass on  
85 their way to the bivouac.

86 To explore such hypotheses, and investigate whether and in which conditions caches would  
87 increase prey retrieval, we developed Netlogo agent-based simulations (Video S2, Table S3,  
88 Supplementary Material text) [9]. Our virtual ants formed columns via releasing/following a trail  
89 pheromone, encountering prey item piles simulating the brood of prey colonies. As ants began  
90 raiding, uncollected prey items started disappearing, simulating brood evacuation. Raiders  
91 collected prey items and cached them with a probability increasing with nestmate density,  
92 simulating the scenario we observed in nature. Other workers recovered up to two cached prey  
93 items and transported them to a densely populated "safe area" simulating a trail bifurcation or the  
94 bivouac itself. When loaded raiders or cache recoverers reached the safe area, prey items  
95 disappeared and were counted as retrieved. We compared caching colonies to non-caching  
96 colonies in which raiders transported prey items directly to the safe area.

97 Overall, the quantity of retrieved prey increased with the number of raiders, but decreased as  
98 brood evacuation speeds and probability to cache/collect cached food increased (Table 1, Model  
99 1). Interestingly, caches allowed ants to retrieve significantly more prey at low numbers of  
100 raiders (50, 100), but this effect became generally less conspicuous - and disappeared - as raider  
101 numbers increased (300, 500, 700; Figure 2, Table 1, Models 2-5). Brood evacuation speed  
102 reduced the amount of prey ants collected at foraging fronts, in turn reducing the amount of time  
103 ants spent retrieving it. Excluding the 700-raider condition, the time ants spent retrieving prey  
104 decreased at increasing raider numbers, whereas the probability of caching/collecting cached  
105 prey did not produce any effect (Table 1, Model 6). Hardly any combination of settings revealed  
106 significant effects of caches on prey retrieval time (Table S4, Figure S2), indicating that,  
107 everything else being equal, caching ants retrieved food at the same speed of non-caching ones.  
108 At very high raider numbers, however, the high individual density occasionally resulted in  
109 persisting ‘death circles’, decelerating prey retrieval. Allowing cache recoverers to keep caching  
110 their loads after collection rarely produced significant effects on the amount of retrieved prey  
111 (Table S5, Figure S3), but increased prey retrieval time at very low and very high numbers of  
112 raiders (Table S6, Figure S4). This likely occurred because raiders in 50-100-individual groups  
113 encountered cached food items relatively rarely, whereas 500-700-raider groups kept  
114 encountering high densities of individuals, caching food very often. This suggested that  
115 excessive caching may slow down prey retrieval, and accordingly, our field observations  
116 revealed a relatively stable flow of multiple-item prey loads through caches (Figure 1G).  
117 Therefore, we hypothesize that, for cache recoverers transporting multiple prey items, it may be  
118 advantageous to unload only at the bivouac and not in other caches.

119 Overall, our findings are in line with the hypothesis that *E. hamatum* caches do not only

120 emerge as heavy traffic byproducts or as aborted bivouacs, but also increase prey collection  
121 efficiency. They may maximize prey retrieval at limited raider numbers - suggesting raider  
122 availability as a factor limiting prey collection at foraging fronts - and when attacked prey  
123 colonies coordinate to evacuate their brood. Importantly, caches may rule out the need to recruit  
124 large numbers of workers, crucially saving the time prey colonies need to evacuate their brood.

125 Further potential research questions concern caching from proximal and individual  
126 perspectives. Experience affects ant behavioral ontogeny and task partitioning [10], but we  
127 ignore its impact in large, complex societies. For example, do *Eciton* foragers specialize in  
128 raiding at foraging fronts or in commuting between caches and the bivouac? Similarly, short-  
129 term experience at foraging fronts (e.g., nest/prey features, prey colony defenses) or at caches  
130 (e.g., number/type of prey items [7,8]) may affect individual foraging decisions. Caches may  
131 allow transfer of information about prey colonies [11,12] and traffic intensity, reducing time-  
132 consuming, risky, unnecessary travel. We also ignore whether returning raiders stop at caches or  
133 proceed depending on prey load size. A potential proximal cause of this would be the stimulus  
134 originating from the extension of the mandibles, greater extension meaning heavier and more  
135 cumbersome loads. Another possibility is experience or age-dependent polyethism relegating  
136 younger workers to traveling between foraging fronts and prey caches, with older individuals  
137 specializing in raiding in a classic task partitioning paradigm [13]. Whatever the mechanism, an  
138 ultimate cause explanation is that individuals carrying multiple prey items should proceed  
139 straight to the bivouac, saving the unloading time and the time for other workers to further  
140 load/unload multiple prey items. The relatively stable flow of multiple-item prey loads we  
141 observed at caches supports this hypothesis.

142 Prey individual/colony size and specific defense strategies also potentially affect cache

8

143 emergence. In our study, small-sized *Pheidole* and *Linepithema* ant brood dominated cached  
144 prey composition, possibly because caching single prey items and transporting them to the  
145 bivouac in multiple-item loads is more efficient for tiny than large-sized prey. Future long-term  
146 sampling across habitats/seasons can reveal whether *E. hamatum* iteratively adjusts its raiding  
147 strategies at a local scale in a prey-dependent fashion. Finally, caches may contribute to safely  
148 storing prey when returning directly to the bivouac is risky. For example, in case of rain,  
149 stocking prey under the leaf litter may increase chances to successfully transport it to the bivouac  
150 at a later time.

151

## 152 **Conclusions**

153 Food caches related to traffic partitioning emerge across distant ant taxa (i.e. *Atta*,  
154 *Camponotus* and *Eciton* [2,5,6,14–18], usually in societies where thousands of individuals  
155 transport large amounts of food through long distances [19–21]. These must carefully balance  
156 foraging investments in terms of energy and time [22–24]. In this study, we suggest that caches  
157 improve prey collection and transport in *E. hamatum*. While our hypotheses need to be tested  
158 through extensive work in the field, they raise novel questions integrating the growing  
159 knowledge of foraging and migration in army ants.

160



## 161 **Methods**

162 We carried out observations in a 220 ha Amazonian primary forest fragment (Terra Firme,  
163 coordinates: -1.034113, -46.766017) in the Bragança city area, state of Pará, Brazil. To locate  
164 caches, we followed foraging columns across multiple sessions (July 2019-January 2020)  
165 between 8:00 am and 4:30 pm, when *E. hamatum* forages [25]. To minimize resampling, we did  
166 not collect caches closer than 50 meters. For each cache, we inspected the surrounding 10-meter  
167 radius for prey nests or bivouacs, noting whether: it appeared at a multiple-trail junction; it was  
168 exposed or covered by leaf litter/fallen tree branches; it was at the side of, or crossed by, trails.  
169 We collected all prey from six caches, immediately placing it in 700 ml plastic containers and  
170 then storing it sorted by developmental stages (larva, pupa, adult) in 70% ethanol. We later  
171 identified prey at the subfamily/genus level using keys for neotropical adult ants [26] and larvae  
172 [27], and measured their length.

## 173 **Field observations and simulations**

174 We filmed caches for 5 minutes from ~30 cm of height (30 fps, 1920 x 1080px). The frame  
175 included individuals arriving from the foraging front and leaving towards the bivouac, as well as  
176 individuals passing at the side of caches. We assumed that *E. hamatum* only transported prey  
177 from foraging fronts to caches to the bivouac (and not the opposite), and that multiple-prey loads  
178 always included only two prey items. We analyzed videos using Boris [28] and developed  
179 simulations in Netlogo.

## 180 **Statistical analyses**

181 Using STATISTICA v.10, we compared numbers of workers walking in the same direction  
182 through CB and FC, considering these as paired data, with Wilcoxon signed-rank tests. For  
183 workers walking in both directions, and one- vs. multiple-prey arriving/departing loads, we

10

184 considered data as unpaired, using Mann Whitney U tests. We analyzed data from simulations  
185 using General Linear Models (GLM) in the R [29] package lme4 [30] (Table S7), generating all  
186 graphs via ggplot2 [31] and gridExtra [32].

187

### 188 **Data accessibility**

189 All data are provided in the Supplementary Materials.

### 190 **Authors' contributions**

191 HPDL and RLCDL conceived the study, conducted fieldwork, analyzed fieldwork data and  
192 edited the manuscript. NC conceived and supervised the study and wrote the manuscript. ST  
193 conceived the study, developed the simulations, analyzed the simulation data and wrote the  
194 manuscript. RSFC conceived the study and edited the manuscript. All authors approved the final  
195 version of the manuscript and agreed to be held accountable for the content therein.

### 196 **Competing interests**

197 Authors have no competing interests.

### 198 **Funding**

199 A CNPq Productivity grant (PQ-2017 grant 311790/2017-8) to NC; a CAPES PROEX  
200 Psicologia Experimental 2016/1964 to N.C., HPDL, RSFC, RLCDL and PROCAD Amazônia; a  
201 Presidential Postdoctoral Fellowship (M408080000) from Nanyang Technological University to  
202 ST. CNPq provided HPDL's PhD scholarship.

### 203 **Acknowledgments**

204 Marília Lobão made the study area available for fieldwork. Erika Dawson and Maria Eduarda  
205 de Lima Vieira commented on the manuscript. We thank USP and its Experimental Psychology  
206 Program, as well as all other universities and postgraduate programs that bravely resist constant

11

207 attacks on science and scientists in Brazil.

208 **Figures**

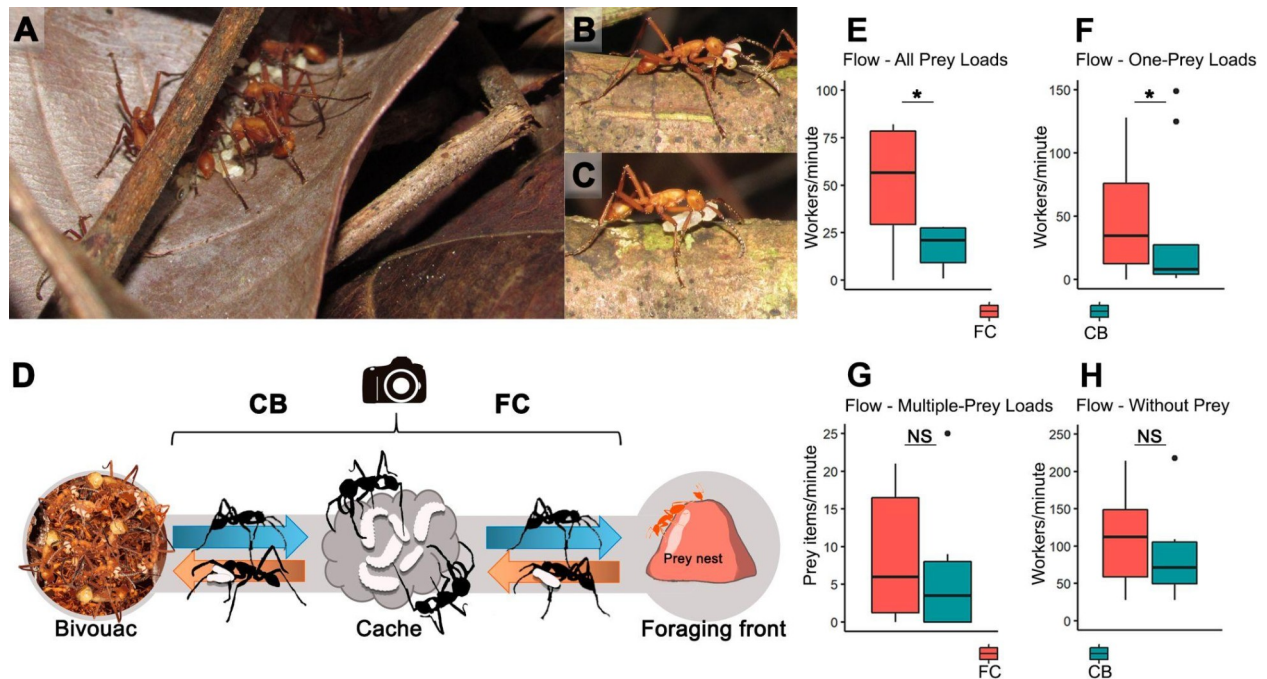

209

210 **Figure 1.** *A.* *Eciton hamatum* cache. *B.* Worker carrying two prey items. *C.* Worker carrying one

211 prey item. *D.* Scheme of field observations. *E.* Flow of all prey-carrying workers. *F.* Workers

212 carrying one prey item. *G.* Workers carrying multiple prey items. *H.* Workers without prey. In

213 whisker plots, central lines, boxes, whiskers and dots respectively show median, quartiles,

214 max/min and outliers. \*\*\*:  $p < 0.001$ , \*\*:  $p < 0.01$ , \*:  $p < 0.05$ ; NS: no significance.

215

216

12

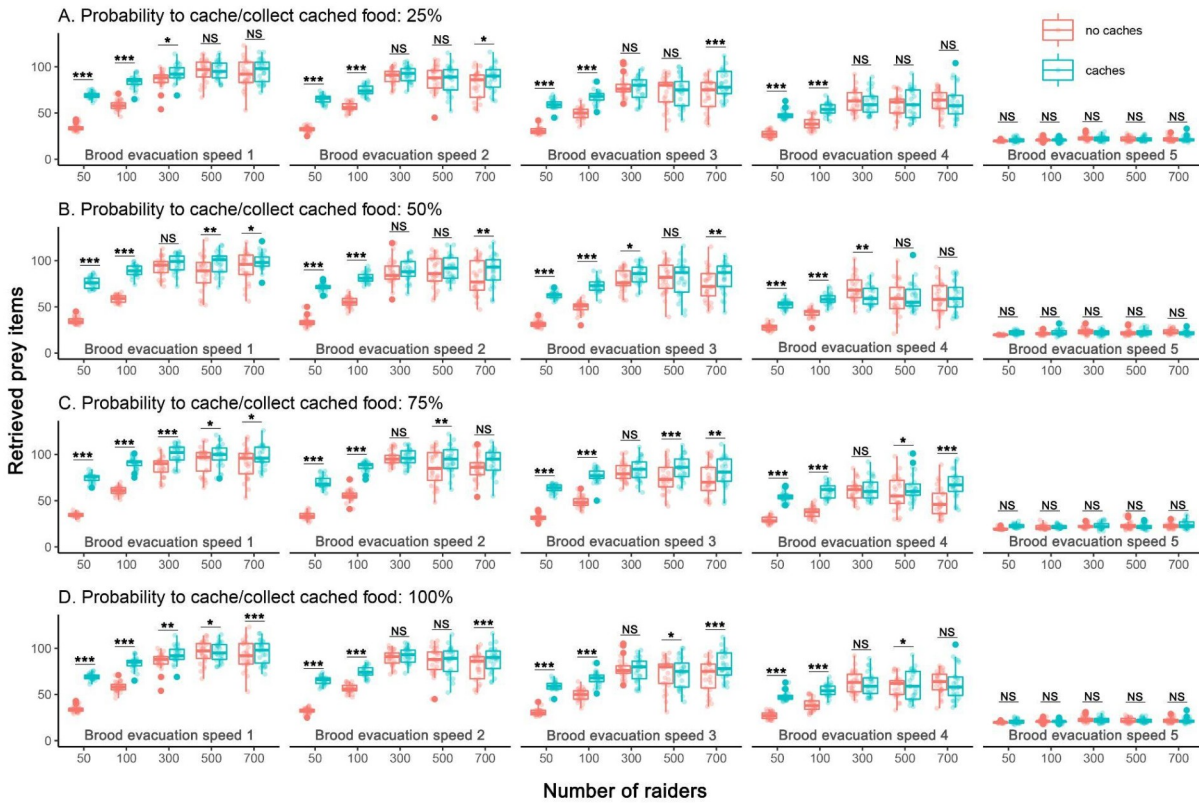

217

218 **Figure 2.** Simulation results. Amount of retrieved prey. In whisker plots (each representing 25  
219 simulations), central lines, boxes, whiskers and dots respectively show median, quartiles,  
220 max/min and outliers. \*\*\*:  $p < 0.001$ , \*\*:  $p < 0.01$ , \*:  $p < 0.05$ ; NS: no significance.

221

222

223

224

225

226

227

228

229

230 **Table 1. Models' outputs.**

| <b>Model 1 - Prey retrieval</b>                                |           |            |          |          | <b>Model 4 - Probability to cache/collect cached food: 75%</b>  |           |            |         |          |
|----------------------------------------------------------------|-----------|------------|----------|----------|-----------------------------------------------------------------|-----------|------------|---------|----------|
|                                                                | Estimate  | Std. error | t value  | p        | <b>Contrast: caches vs. no caches</b>                           |           |            |         |          |
| Intercept                                                      | 3.987343  | 0.11107    | 360.197  | < 0.001  | brood evacuation speed 1; 50 raiders                            | 0.770862  | 0.049487   | 15.577  | < 0.001  |
| brood evacuation speed 2                                       | -0.061278 | 0.008446   | -7.255   | < 0.001  | brood evacuation speed 2; 50 raiders                            | 0.741026  | 0.050432   | 14.694  | < 0.001  |
| brood evacuation speed 3                                       | -0.17475  | 0.008704   | -20.078  | < 0.001  | brood evacuation speed 3; 50 raiders                            | 0.687471  | 0.052173   | 13.177  | < 0.001  |
| brood evacuation speed 4                                       | -0.402512 | 0.009289   | -43.333  | < 0.001  | brood evacuation speed 4; 50 raiders                            | 0.621586  | 0.055291   | 11.242  | < 0.001  |
| brood evacuation speed 5                                       | -1.311772 | 0.012765   | -102.764 | < 0.001  | brood evacuation speed 5; 50 raiders                            | 0.145016  | 0.074259   | 1.953   | 0.051071 |
| Probability to cache/collect cached food: 50%                  | 0.033392  | 0.008616   | 3.875    | < 0.001  | brood evacuation speed 1; 100 raiders                           | 0.399499  | 0.039875   | 10.019  | < 0.001  |
| Probability to cache/collect cached food: 75%                  | 0.040408  | 0.008601   | 4.698    | < 0.001  | brood evacuation speed 2; 100 raiders                           | 0.442905  | 0.041127   | 10.769  | < 0.001  |
| Probability to cache/collect cached food: 100%                 | -0.016747 | 0.008724   | -1.92    | 0.054    | brood evacuation speed 3; 100 raiders                           | 0.451911  | 0.043948   | 10.283  | < 0.001  |
| 100 raiders                                                    | 0.280664  | 0.010991   | 25.535   | < 0.001  | brood evacuation speed 4; 100 raiders                           | 0.479421  | 0.049855   | 9.616   | < 0.001  |
| 300 raiders                                                    | 0.550067  | 0.010418   | 52.8     | < 0.001  | brood evacuation speed 5; 100 raiders                           | 0.035221  | 0.073073   | 0.482   | 0.629892 |
| 500 raiders                                                    | 0.516625  | 0.010482   | 49.285   | < 0.001  | brood evacuation speed 1; 300 raiders                           | 0.144982  | 0.035261   | 4.112   | < 0.001  |
| 700 raiders                                                    | 0.511538  | 0.010492   | 48.753   | < 0.001  | brood evacuation speed 2; 300 raiders                           | 0.001654  | 0.034511   | 0.048   | 0.961777 |
|                                                                |           |            |          |          | brood evacuation speed 3; 300 raiders                           | 0.030548  | 0.037371   | 0.817   | 0.413856 |
|                                                                |           |            |          |          | brood evacuation speed 4; 300 raiders                           | 0.028298  | 0.043039   | 0.657   | 0.510995 |
|                                                                |           |            |          |          | brood evacuation speed 5; 300 raiders                           | 0.003534  | 0.071331   | 0.05    | 0.960499 |
|                                                                |           |            |          |          | brood evacuation speed 1; 500 raiders                           | 0.071459  | 0.034605   | 2.065   | < 0.05   |
|                                                                |           |            |          |          | brood evacuation speed 2; 500 raiders                           | 0.094334  | 0.035824   | 2.633   | < 0.01   |
|                                                                |           |            |          |          | brood evacuation speed 3; 500 raiders                           | 0.14346   | 0.038073   | 3.768   | < 0.001  |
|                                                                |           |            |          |          | brood evacuation speed 4; 500 raiders                           | 0.106547  | 0.043697   | 2.438   | < 0.05   |
|                                                                |           |            |          |          | brood evacuation speed 5; 500 raiders                           | -0.040678 | 0.071377   | -0.57   | 0.568856 |
|                                                                |           |            |          |          | brood evacuation speed 1; 700 raiders                           | 0.070488  | 0.034984   | 2.015   | < 0.05   |
|                                                                |           |            |          |          | brood evacuation speed 2; 700 raiders                           | 0.06809   | 0.03605    | 1.889   | 0.059165 |
|                                                                |           |            |          |          | brood evacuation speed 3; 700 raiders                           | 0.100394  | 0.038637   | 2.598   | < 0.01   |
|                                                                |           |            |          |          | brood evacuation speed 4; 700 raiders                           | 0.322321  | 0.045115   | 7.144   | < 0.001  |
|                                                                |           |            |          |          | brood evacuation speed 5; 700 raiders                           | 0.050945  | 0.069947   | 0.728   | 0.466552 |
|                                                                |           |            |          |          |                                                                 |           |            |         |          |
| <b>Model 2 - Probability to cache/collect cached food: 25%</b> |           |            |          |          | <b>Model 5 - Probability to cache/collect cached food: 100%</b> |           |            |         |          |
|                                                                | Estimate  | Std. error | t value  | p        | <b>Contrast: caches vs. no caches</b>                           |           |            |         |          |
| brood evacuation speed 1; 50 raiders                           | 0.711218  | 0.049514   | 14.364   | < 0.001  | brood evacuation speed 1; 50 raiders                            | 0.392413  | 0.056245   | 6.977   | < 0.001  |
| brood evacuation speed 2; 50 raiders                           | 0.6913    | 0.050795   | 13.61    | < 0.001  | brood evacuation speed 2; 50 raiders                            | 0.360376  | 0.058843   | 6.124   | < 0.001  |
| brood evacuation speed 3; 50 raiders                           | 0.658218  | 0.052418   | 12.557   | < 0.001  | brood evacuation speed 3; 50 raiders                            | 0.329286  | 0.058897   | 5.591   | < 0.001  |
| brood evacuation speed 4; 50 raiders                           | 0.55878   | 0.056673   | 9.86     | < 0.001  | brood evacuation speed 4; 50 raiders                            | 0.341534  | 0.062102   | 5.5     | < 0.001  |
| brood evacuation speed 5; 50 raiders                           | 0.055024  | 0.074133   | 0.742    | 0.45809  | brood evacuation speed 5; 50 raiders                            | 0.025872  | 0.081051   | 0.319   | 0.749625 |
| brood evacuation speed 1; 100 raiders                          | 0.361802  | 0.040311   | 8.975    | < 0.001  | brood evacuation speed 1; 100 raiders                           | 0.232182  | 0.043803   | 5.301   | < 0.001  |
| brood evacuation speed 2; 100 raiders                          | 0.281801  | 0.041745   | 6.75     | < 0.001  | brood evacuation speed 2; 100 raiders                           | 0.303544  | 0.045658   | 6.648   | < 0.001  |
| brood evacuation speed 3; 100 raiders                          | 0.302281  | 0.044256   | 6.83     | < 0.001  | brood evacuation speed 3; 100 raiders                           | 0.320526  | 0.049065   | 6.533   | < 0.001  |
| brood evacuation speed 4; 100 raiders                          | 0.336472  | 0.049444   | 6.805    | < 0.001  | brood evacuation speed 4; 100 raiders                           | 0.360469  | 0.054386   | 6.628   | < 0.001  |
| brood evacuation speed 5; 100 raiders                          | -0.005753 | 0.073211   | -0.079   | 0.93738  | brood evacuation speed 5; 100 raiders                           | -0.001899 | 0.079176   | -0.024  | 0.980865 |
| brood evacuation speed 1; 300 raiders                          | 0.079757  | 0.03531    | 2.259    | < 0.05   | brood evacuation speed 1; 300 raiders                           | 0.099653  | 0.037684   | 2.644   | < 0.01   |
| brood evacuation speed 2; 300 raiders                          | 0.030299  | 0.035037   | 0.865    | 0.38734  | brood evacuation speed 2; 300 raiders                           | 0.062745  | 0.038473   | 1.631   | 0.10318  |
| brood evacuation speed 3; 300 raiders                          | -0.017608 | 0.038048   | -0.463   | 0.6436   | brood evacuation speed 3; 300 raiders                           | -0.077686 | 0.039927   | -1.946  | 0.051925 |
| brood evacuation speed 4; 300 raiders                          | -0.018053 | 0.042454   | -0.425   | 0.67073  | brood evacuation speed 4; 300 raiders                           | -0.025494 | 0.043733   | -0.583  | 0.560037 |
| brood evacuation speed 5; 300 raiders                          | -0.033483 | 0.070191   | -0.477   | 0.63343  | brood evacuation speed 5; 300 raiders                           | 0.003704  | 0.07818    | 0.047   | 0.962223 |
| brood evacuation speed 1; 500 raiders                          | 0.009605  | 0.034167   | 0.281    | 0.77866  | brood evacuation speed 1; 500 raiders                           | 0.074805  | 0.037579   | 1.991   | < 0.05   |
| brood evacuation speed 2; 500 raiders                          | -0.008272 | 0.035841   | -0.231   | 0.81751  | brood evacuation speed 2; 500 raiders                           | 0.032652  | 0.039241   | 0.832   | 0.405518 |
| brood evacuation speed 3; 500 raiders                          | 0.007149  | 0.039206   | 0.182    | 0.85535  | brood evacuation speed 3; 500 raiders                           | 0.091788  | 0.041756   | 2.198   | < 0.05   |
| brood evacuation speed 4; 500 raiders                          | 0.052944  | 0.043291   | 1.223    | 0.22158  | brood evacuation speed 4; 500 raiders                           | 0.119578  | 0.048966   | 2.442   | < 0.05   |
| brood evacuation speed 5; 500 raiders                          | -0.001837 | 0.071648   | -0.026   | 0.97955  | brood evacuation speed 5; 500 raiders                           | 0.056123  | 0.077321   | 0.726   | 0.468071 |
| brood evacuation speed 1; 700 raiders                          | 0.044115  | 0.034551   | 1.199    | 0.2309   | brood evacuation speed 1; 700 raiders                           | 0.17942   | 0.038247   | 4.691   | < 0.001  |
| brood evacuation speed 2; 700 raiders                          | 0.089328  | 0.036468   | 2.45     | < 0.05   | brood evacuation speed 2; 700 raiders                           | 0.161147  | 0.039754   | 4.054   | < 0.001  |
| brood evacuation speed 3; 700 raiders                          | 0.151532  | 0.038557   | 3.93     | < 0.001  | brood evacuation speed 3; 700 raiders                           | 0.13893   | 0.041664   | 3.335   | < 0.001  |
| brood evacuation speed 4; 700 raiders                          | -0.013553 | 0.042473   | -0.319   | 0.74971  | brood evacuation speed 4; 700 raiders                           | 0.030691  | 0.046428   | 0.661   | 0.508709 |
| brood evacuation speed 5; 700 raiders                          | 0.00367   | 0.071615   | 0.051    | 0.95914  | brood evacuation speed 5; 700 raiders                           | 0.003559  | 0.076634   | 0.046   | 0.962969 |
|                                                                |           |            |          |          |                                                                 |           |            |         |          |
| <b>Model 3 - Probability to cache/collect cached food: 50%</b> |           |            |          |          | <b>Model 6 - Time spent retrieving prey</b>                     |           |            |         |          |
|                                                                | Estimate  | Std. error | t value  | p        |                                                                 | Estimate  | Std. error | t value | p        |
| brood evacuation speed 1; 50 raiders                           | 0.77319   | 0.051412   | 15.039   | < 0.001  | Intercept                                                       | 4.18616   | 0.03136    | 133.483 | < 0.001  |
| brood evacuation speed 2; 50 raiders                           | 0.732796  | 0.052618   | 13.927   | < 0.001  | brood evacuation speed 2                                        | -0.03542  | 0.02786    | -1.272  | 0.203595 |
| brood evacuation speed 3; 50 raiders                           | 0.683021  | 0.054988   | 12.421   | < 0.001  | brood evacuation speed 3                                        | -0.06278  | 0.02805    | -2.238  | < 0.05   |
| brood evacuation speed 4; 50 raiders                           | 0.628035  | 0.059201   | 10.609   | < 0.001  | brood evacuation speed 4                                        | -0.09426  | 0.02828    | -3.332  | < 0.001  |
| brood evacuation speed 5; 50 raiders                           | 0.113474  | 0.078415   | 1.447    | 0.148129 | brood evacuation speed 5                                        | -0.34247  | 0.0303     | -11.303 | < 0.001  |
| brood evacuation speed 1; 100 raiders                          | 0.412915  | 0.042449   | 9.727    | < 0.001  | Probability to cache/collect cached food: 50%                   | -0.02138  | 0.02575    | -0.831  | 0.406268 |
| brood evacuation speed 2; 100 raiders                          | 0.392355  | 0.043975   | 8.922    | < 0.001  | Probability to cache/collect cached food: 75%                   | -0.06035  | 0.026      | -2.321  | < 0.05   |
| brood evacuation speed 3; 100 raiders                          | 0.394055  | 0.046522   | 8.47     | < 0.001  | Probability to cache/collect cached food: 100%                  | -0.02857  | 0.02579    | -1.108  | 0.268129 |
| brood evacuation speed 4; 100 raiders                          | 0.300105  | 0.050705   | 5.919    | < 0.001  | 100 raiders                                                     | -0.05383  | 0.03017    | -1.784  | 0.074455 |
| brood evacuation speed 5; 100 raiders                          | 0.04437   | 0.07681    | 0.578    | 0.563606 | 300 raiders                                                     | -0.09955  | 0.03053    | -3.26   | < 0.01   |
| brood evacuation speed 1; 300 raiders                          | 0.050905  | 0.036643   | 1.389    | 0.165026 | 500 raiders                                                     | -0.13098  | 0.03079    | -4.254  | < 0.001  |
| brood evacuation speed 2; 300 raiders                          | 0.029921  | 0.038033   | 0.787    | 0.431606 | 700 raiders                                                     | 0.42363   | 0.02707    | 15.648  | < 0.001  |
| brood evacuation speed 3; 300 raiders                          | 0.079926  | 0.039451   | 2.026    | < 0.05   |                                                                 |           |            |         |          |
| brood evacuation speed 4; 300 raiders                          | -0.125964 | 0.044119   | -2.855   | < 0.01   |                                                                 |           |            |         |          |
| brood evacuation speed 5; 300 raiders                          | -0.049219 | 0.0749     | -0.657   | 0.511226 |                                                                 |           |            |         |          |
| brood evacuation speed 1; 500 raiders                          | 0.117118  | 0.037242   | 3.145    | < 0.01   |                                                                 |           |            |         |          |
| brood evacuation speed 2; 500 raiders                          | 0.041114  | 0.037763   | 1.089    | 0.276494 |                                                                 |           |            |         |          |
| brood evacuation speed 3; 500 raiders                          | -0.007391 | 0.039648   | -0.186   | 0.852149 |                                                                 |           |            |         |          |
| brood evacuation speed 4; 500 raiders                          | 0.030813  | 0.046231   | 0.667    | 0.505218 |                                                                 |           |            |         |          |
| brood evacuation speed 5; 500 raiders                          | 0.012647  | 0.075921   | 0.167    | 0.867727 |                                                                 |           |            |         |          |
| brood evacuation speed 1; 700 raiders                          | 0.072964  | 0.036487   | 2        | < 0.05   |                                                                 |           |            |         |          |
| brood evacuation speed 2; 700 raiders                          | 0.09985   | 0.038613   | 2.586    | < 0.01   |                                                                 |           |            |         |          |
| brood evacuation speed 3; 700 raiders                          | 0.1072    | 0.04049    | 2.648    | < 0.01   |                                                                 |           |            |         |          |
| brood evacuation speed 4; 700 raiders                          | 0.035396  | 0.046163   | 0.767    | 0.443374 |                                                                 |           |            |         |          |
| brood evacuation speed 5; 700 raiders                          | -0.05311  | 0.075169   | -0.707   | 0.47999  |                                                                 |           |            |         |          |

## 234 References

- 235 1. Gottwald HW. 1995 Army ants: the biology of social predators.
- 236 2. Kronauer DJC. 2020 *Army Ants: Nature's Ultimate Social Hunters*. Harvard University Press.
- 237 3. Schneirla TC. 1934 Raiding and Other Outstanding Phenomena in the Behavior of Army Ants. *Proc. Natl.*  
238 *Acad. Sci. U. S. A.* **20**, 316–321.
- 239 4. Rettenmeyer C w. 1953 ARTHROPODS ASSOCIATED WITH NEOTROPICAL ARMY ANTS WITH A  
240 REVIEW OF THE BEHAVIOR OF THESE ANTS (ARTHROPODA; FORMICIDAE; DORYLINAЕ).  
241 Doctor of Philosophy, Swarthmore College.
- 242 5. Hart AG, Ratnieks FLW. 2001 Leaf caching in the leafcutting ant *Atta colombica*: organizational shift, task  
243 partitioning and making the best of a bad job. *Anim. Behav.* **62**, 227–234.
- 244 6. Hart AG, Ratnieks FL. 2000 Leaf caching in *Atta* leafcutting ants: discrete cache formation through  
245 positive feedback. *Anim. Behav.* **59**, 587–591.
- 246 7. Topoff H, Mirenda J, Droual R, Herrick S. 1980 Behavioural ecology of mass recruitment in the army ant  
247 *Neivamyrmex nigrescens*. *Anim. Behav.* **28**, 779–789.
- 248 8. Droual R. 1983 The organization of nest evacuation in *Pheidole desertorum wheeler* and *P. hyatti emery*  
249 (Hymenoptera: Formicidae). *Behav. Ecol. Sociobiol.* **12**, 203–208.
- 250 9. In press. NetLogo Home Page. See <http://ccl.northwestern.edu/netlogo/> (accessed on 10 August 2021).
- 251 10. Ravary F, Lecoutey E, Kaminski G, Châline N, Jaisson P. 2007 Individual experience alone can generate  
252 lasting division of labor in ants. *Curr. Biol.* **17**, 1308–1312.
- 253 11. Dussutour A, Fourcassié V, Helbing D, Deneubourg J-L. 2004 Optimal traffic organization in ants under  
254 crowded conditions. *Nature* **428**, 70–73.
- 255 12. Dussutour A, Beshers S, Deneubourg J-L, Fourcassié V. 2007 Crowding increases foraging efficiency in  
256 the leaf-cutting ant *Atta colombica*. *Insectes Soc.* **54**, 158–165.
- 257 13. Ratnieks FLW, Anderson C. 1999 Task partitioning in insect societies. *Insectes Soc.* **46**, 95–108.
- 258 14. Hoenle PO, Blüthgen N, Brückner A, Kronauer DJC, Fiala B, Donoso DA, Smith MA, Ospina Jara B, von  
259 Beeren C. 2019 Species-level predation network uncovers high prey specificity in a Neotropical army ant  
260 community. *Mol. Ecol.* **28**, 2423–2440.
- 261 15. Manubay JA, Powell S. 2020 Detection of prey odours underpins dietary specialization in a Neotropical  
262 top-predator: How army ants find their ant prey. *J. Anim. Ecol.* **89**, 1165–1174.
- 263 16. Anderson C, Boomsma JJ, Bartholdi, III, J. J. 2002 Task partitioning in insect societies: bucket brigades.  
264 *Insectes Soc.* **49**, 171–180.
- 265 17. Jeanne RL. 1986 THE EVOLUTION OF THE ORGANIZATION OF WORK IN SOCIAL INSECTS.  
266 *Monitore Zoologico Italiano - Italian Journal of Zoology* **20**, 119–133.
- 267 18. Wang Q, Song W, Zhang J, Lo S. 2018 Bi-directional movement characteristics of *Camponotus japonicus*  
268 ants during nest relocation. *J. Exp. Biol.* **221**. (doi:10.1242/jeb.181669)

- 269 19. Couzin ID, Franks NR. 2003 Self-organized lane formation and optimized traffic flow in army ants. *Proc.*  
270 *Biol. Sci.* **270**, 139–146.
- 271 20. Fowler HG, Robinson SW. 1979 Foraging by *Atta sexdens* (Formicidae: Attini): seasonal patterns, caste  
272 and efficiency. *Ecol. Entomol.* **4**, 239–247.
- 273 21. Losos JB. 2011 Convergence, adaptation, and constraint. *Evolution*
- 274 22. Bartholomew GA, Lighton JRB, Feener DH. 1988 Energetics of Trail Running, Load Carriage, and  
275 Emigration in the Column-Raiding Army Ant *Eciton hamatum*. *Physiological Zoology*. **61**, 57–68.  
276 (doi:10.1086/physzool.61.1.30163737)
- 277 23. MacArthur RH, Pianka ER. 1966 On Optimal Use of a Patchy Environment. *The American Naturalist*. **100**,  
278 603–609. (doi:10.1086/282454)
- 279 24. Pyke GH. 1984 OPTIMAL FORAGING THEORY: A CRITICAL REVIEW. *Annu. Rev. Ecol. Syst.* **15**,  
280 523–575.
- 281 25. Powell S, Baker B. 2008 Os grandes predadores dos neotrópicos: comportamento, dieta e impacto das  
282 formigas de correição (Ecitoninae). *Insetos sociais: da biologia à aplicação*, 18–37.
- 283 26. Baccaro FB, Feitosa RM, Fernandez F, Fernandes IO, Izzo TJ, Souza LP, Solar R. 2015 Guia para gêneros  
284 de formigas no Brasil. *Editora Inpa, Manaus*, 382p
- 285 27. Wheeler GC, Wheeler J, Others. 1976 Ant larvae: review and synthesis.
- 286 28. Friard O, Gamba M. 2016 BORIS : a free, versatile open-source event-logging software for video/audio  
287 coding and live observations. *Methods in Ecology and Evolution*. **7**, 1325–1330. (doi:10.1111/2041-  
288 210x.12584)
- 289 29. R Core Team. 2020 R: A language and environment for statistical computing. R Foundation for Statistical  
290 Computing, Vienna, Austria.
- 291 30. Bates D, Mächler M, Bolker B, Walker S. 2015 Fitting Linear Mixed-Effects Models Using lme4. *Journal*  
292 *of Statistical Software*. **67**. (doi:10.18637/jss.v067.i01)
- 293 31. Wickham H. 2016 *ggplot2: Elegant Graphics for Data Analysis*. Springer.
- 294 32. Auguie B. 2017 Miscellaneous Functions for ‘Grid’ Graphics [R package gridExtra version 2.3].

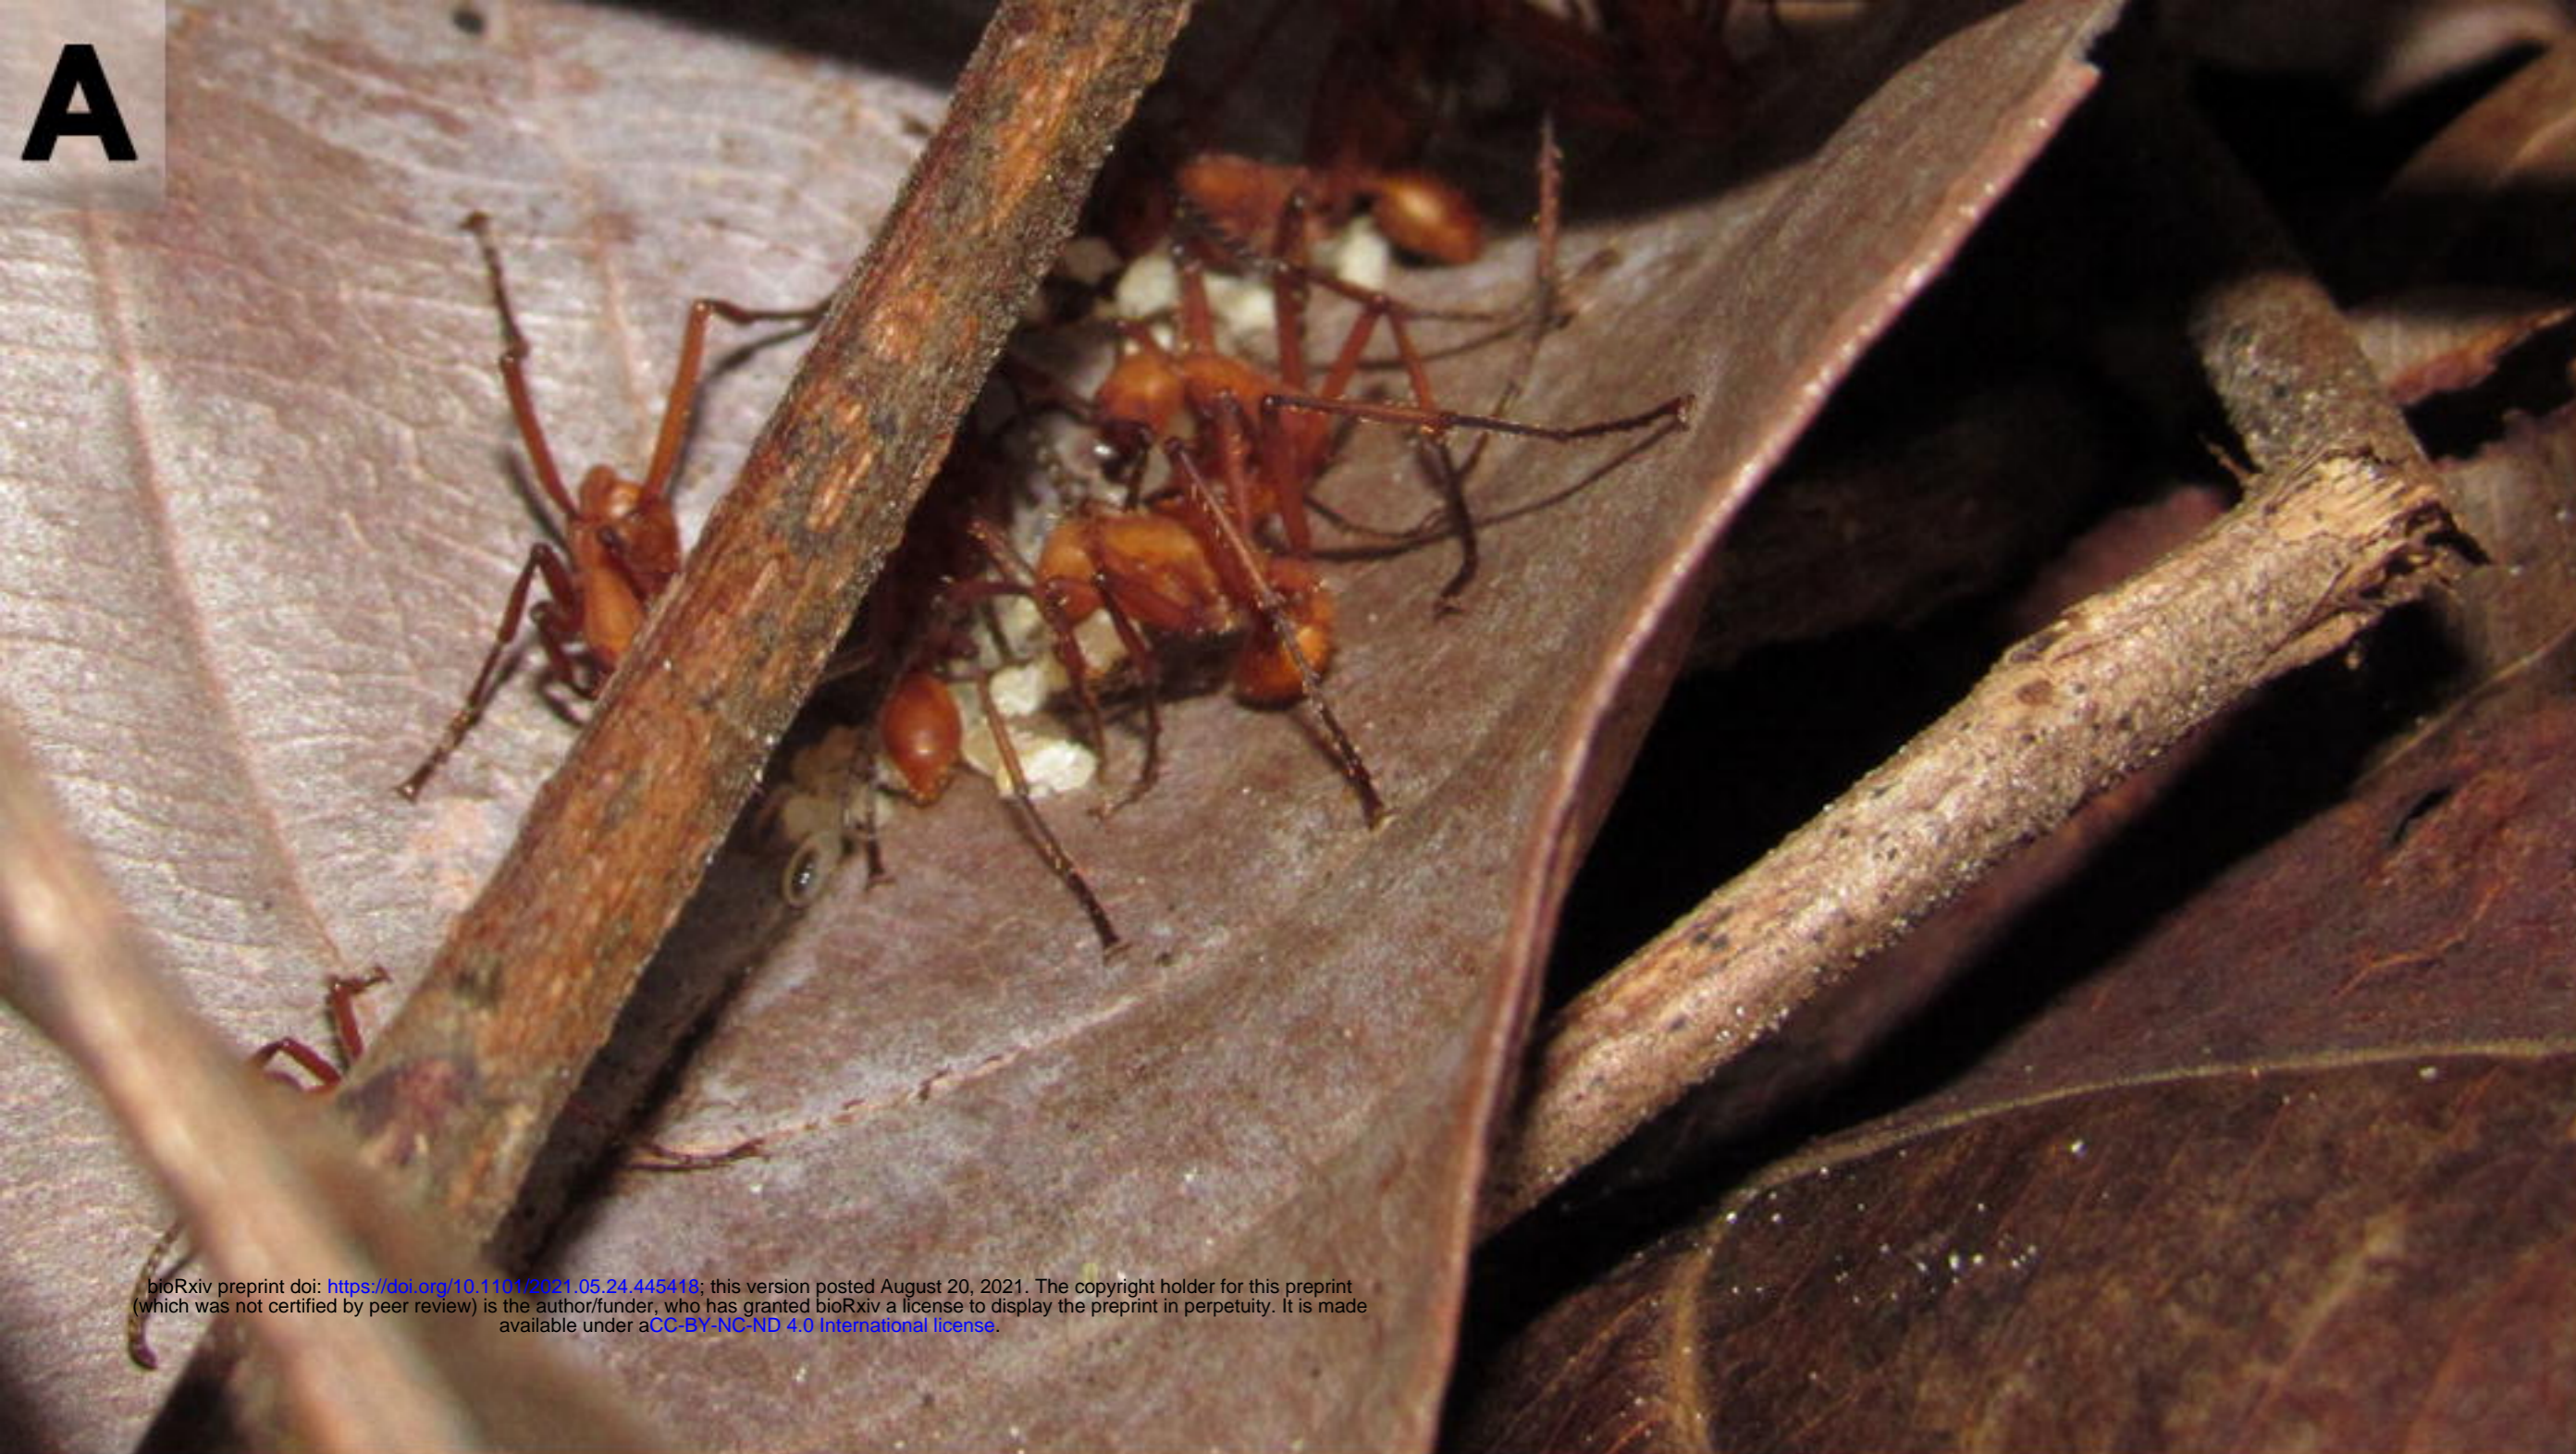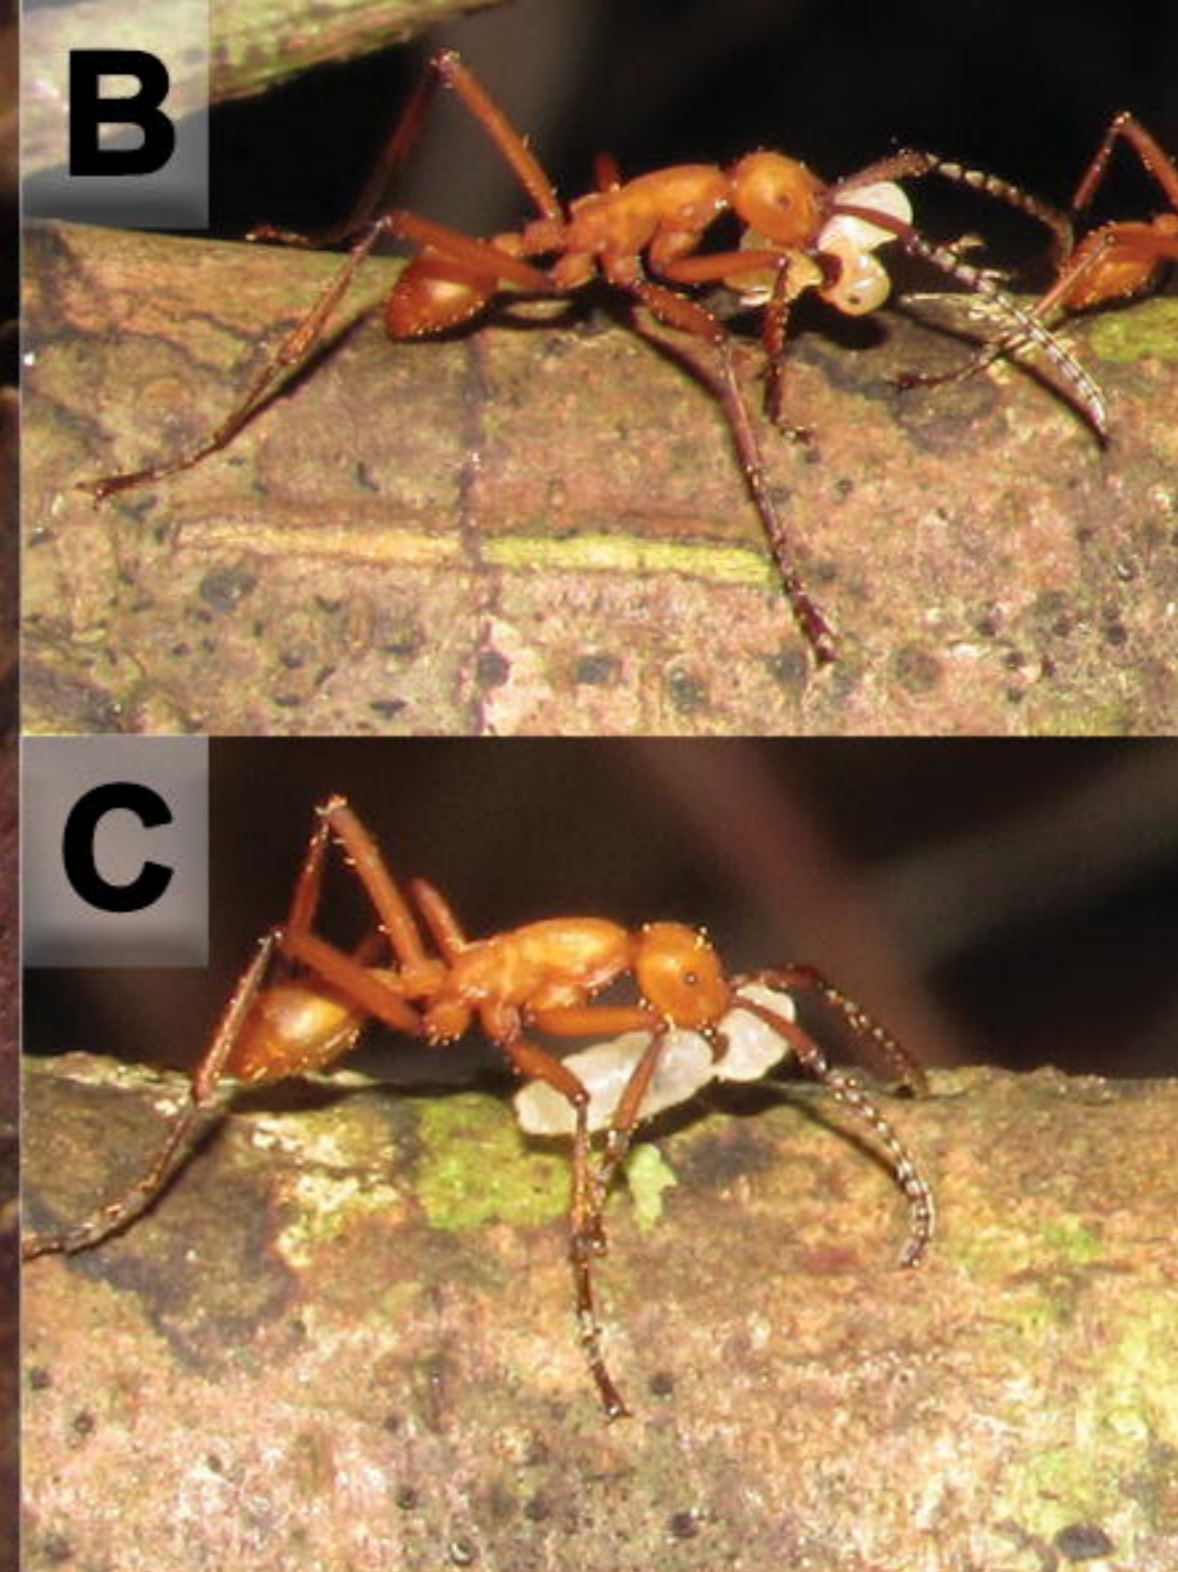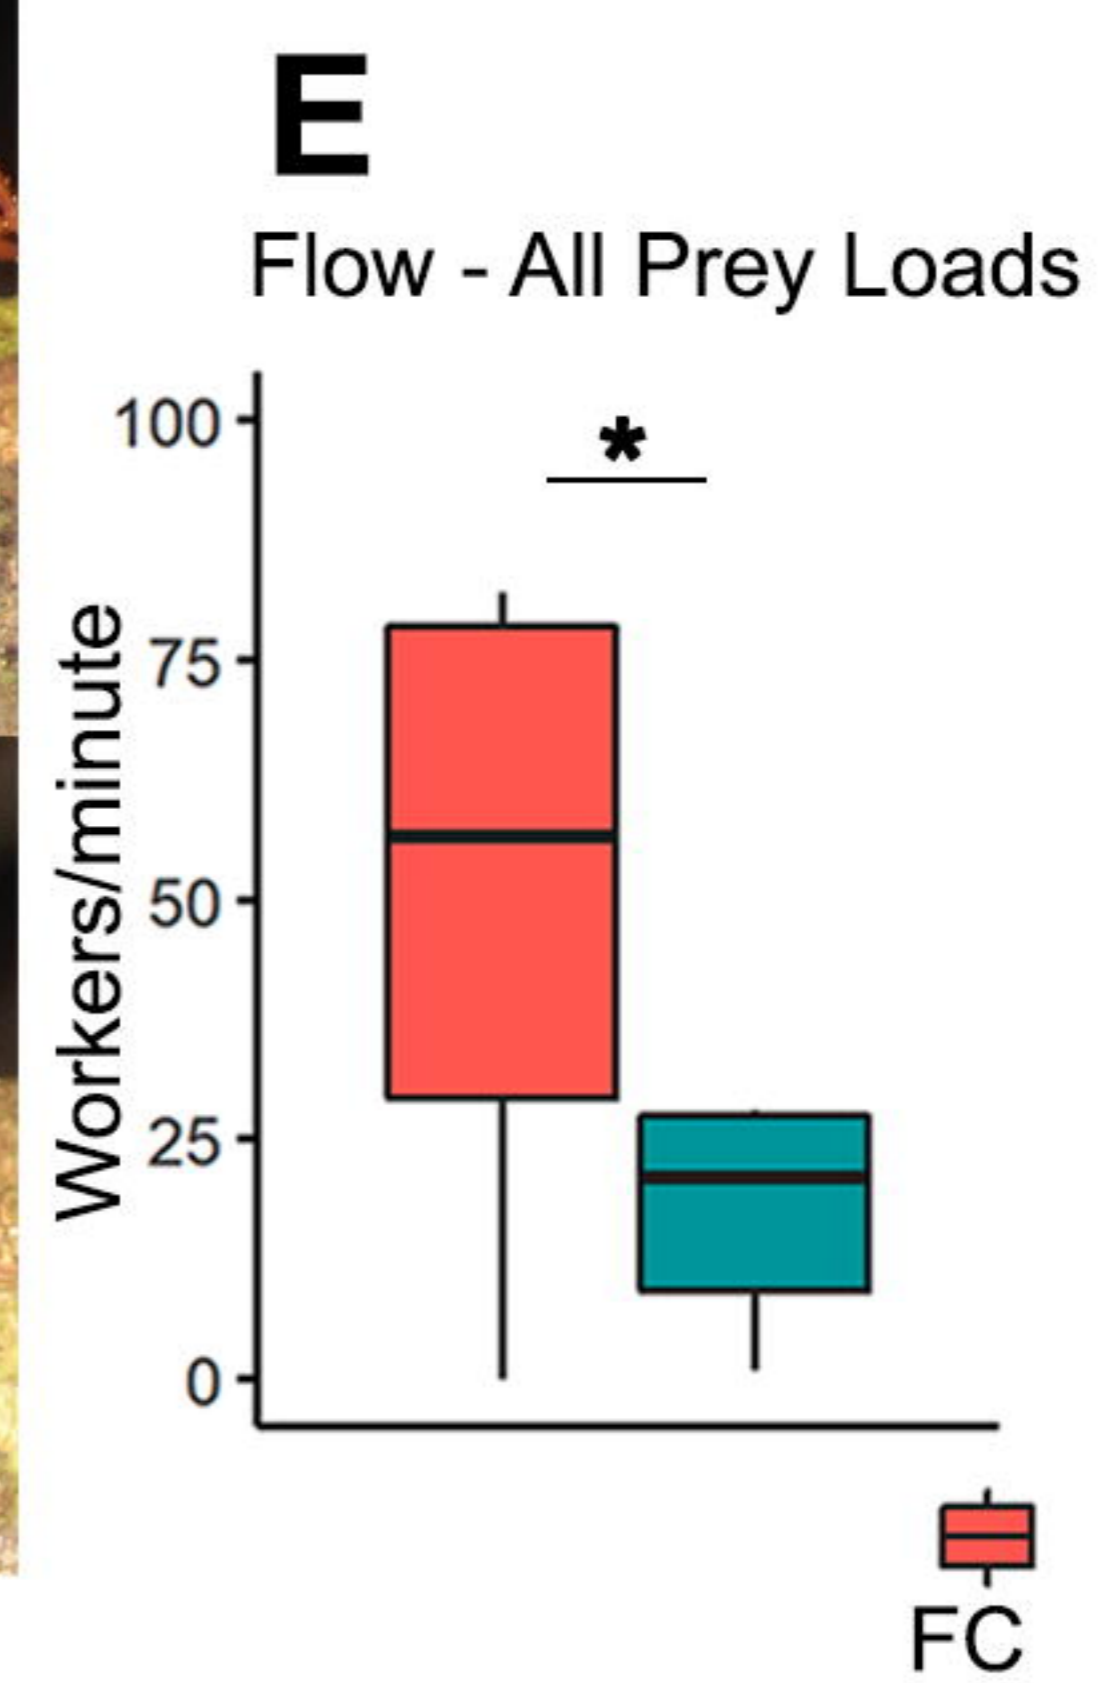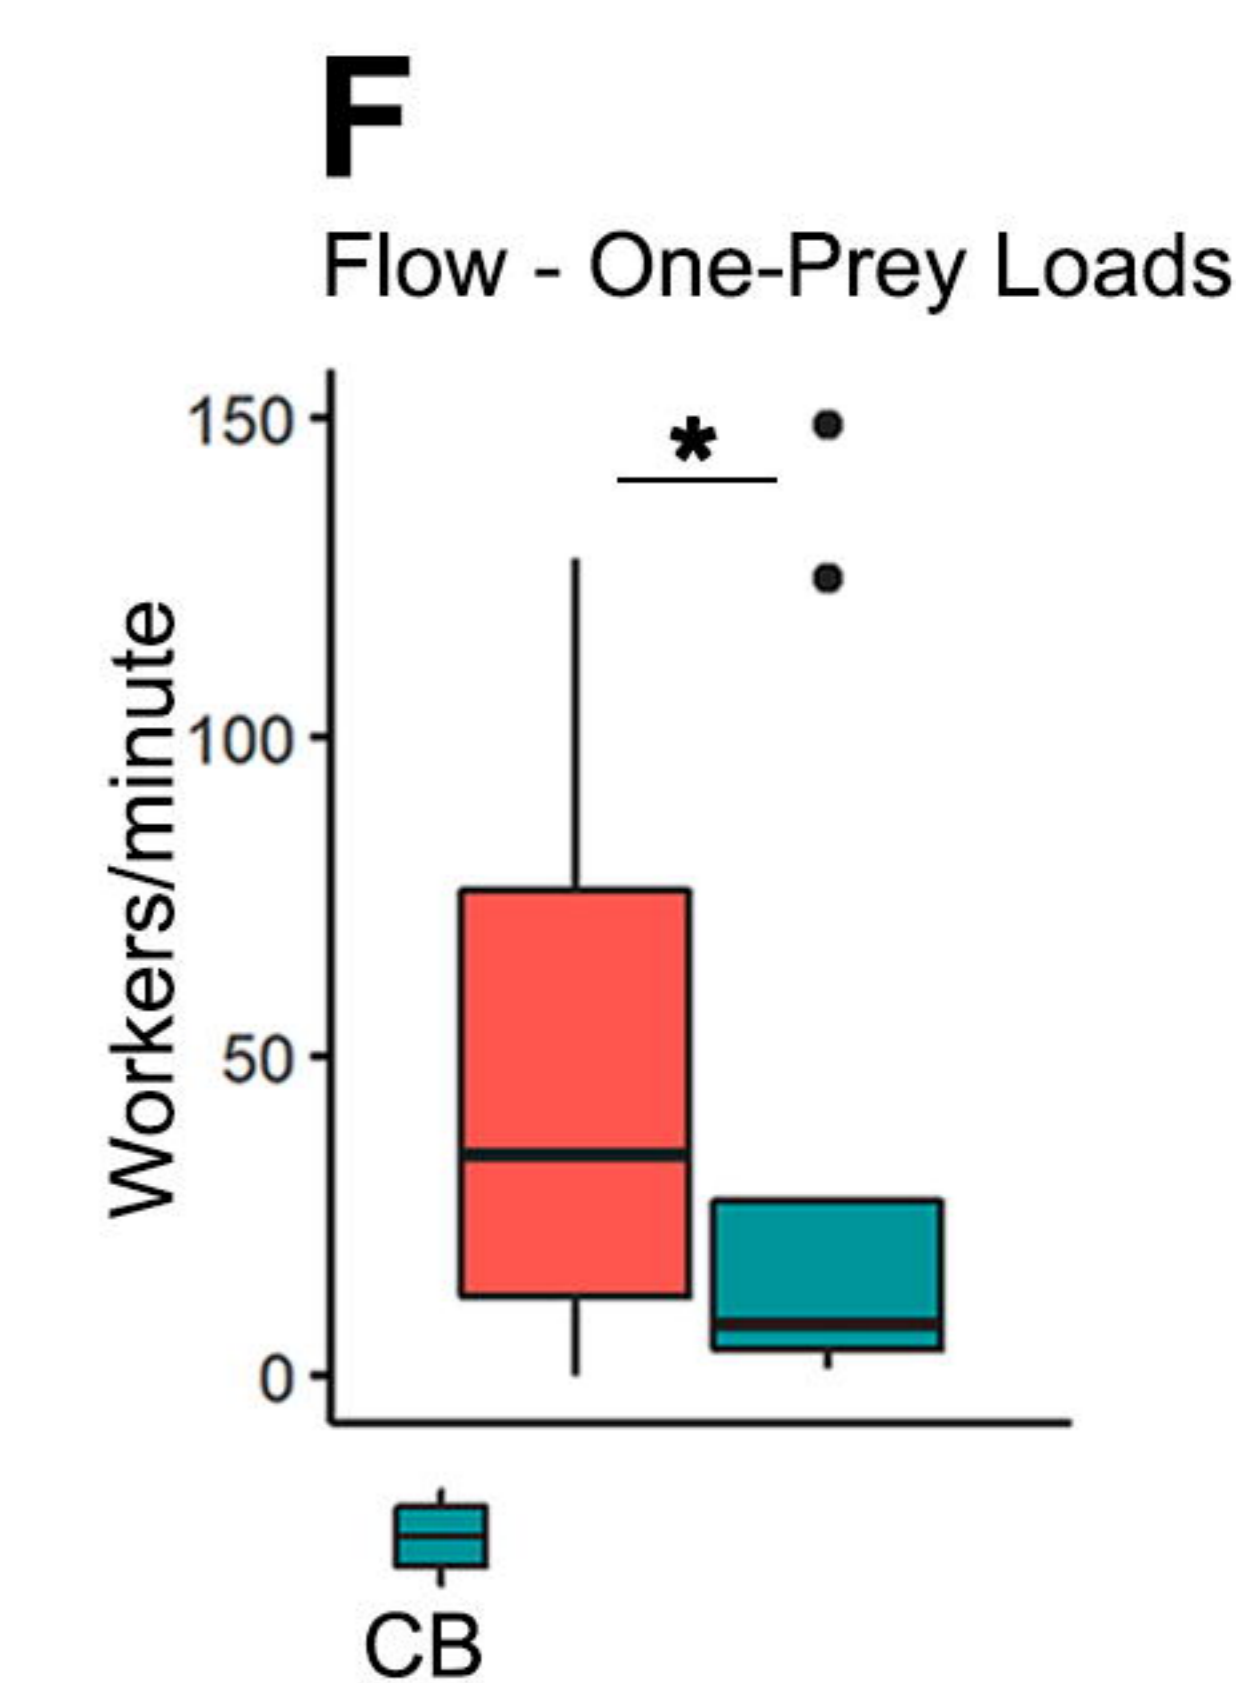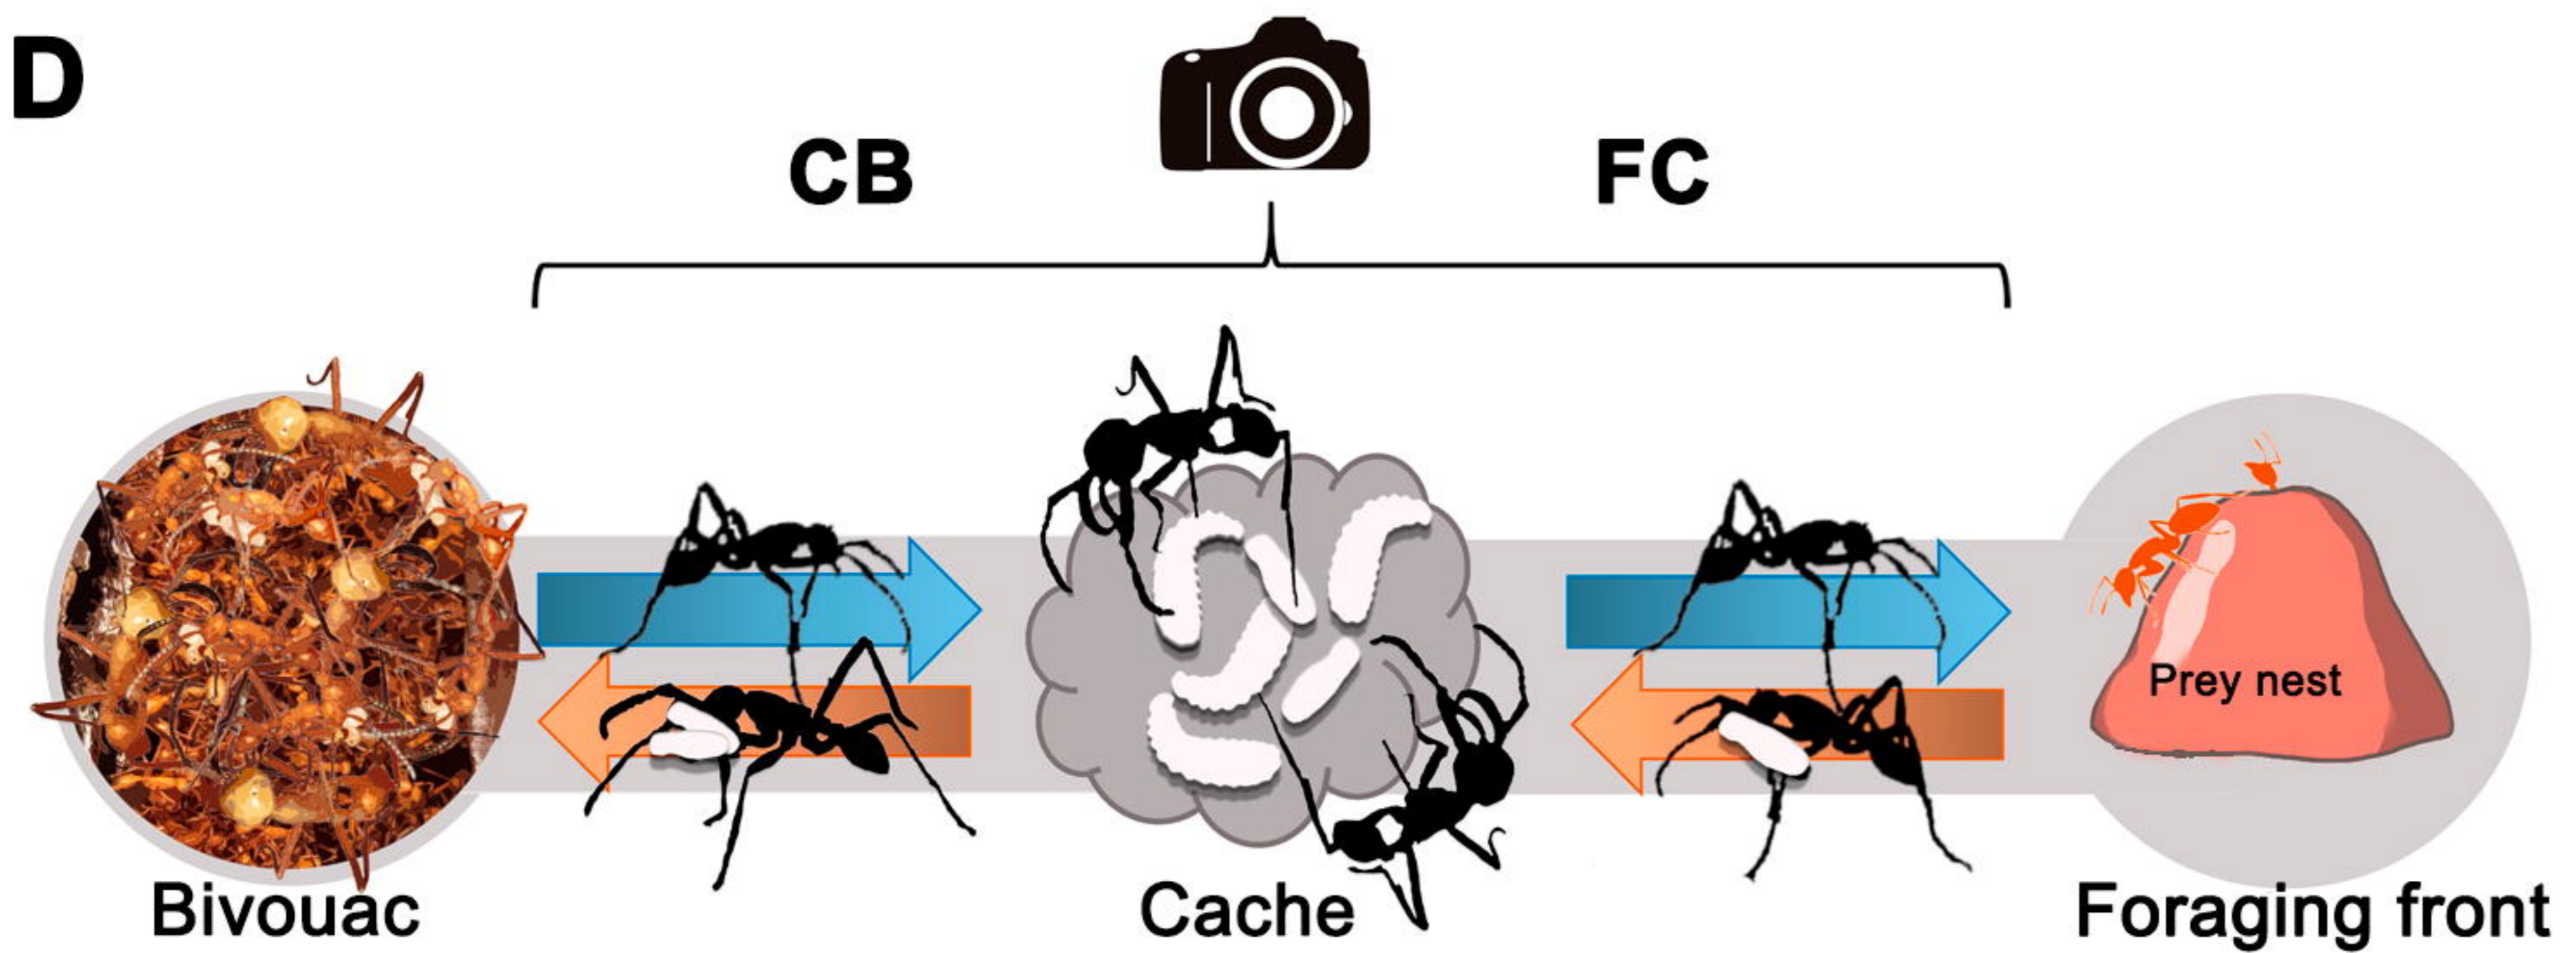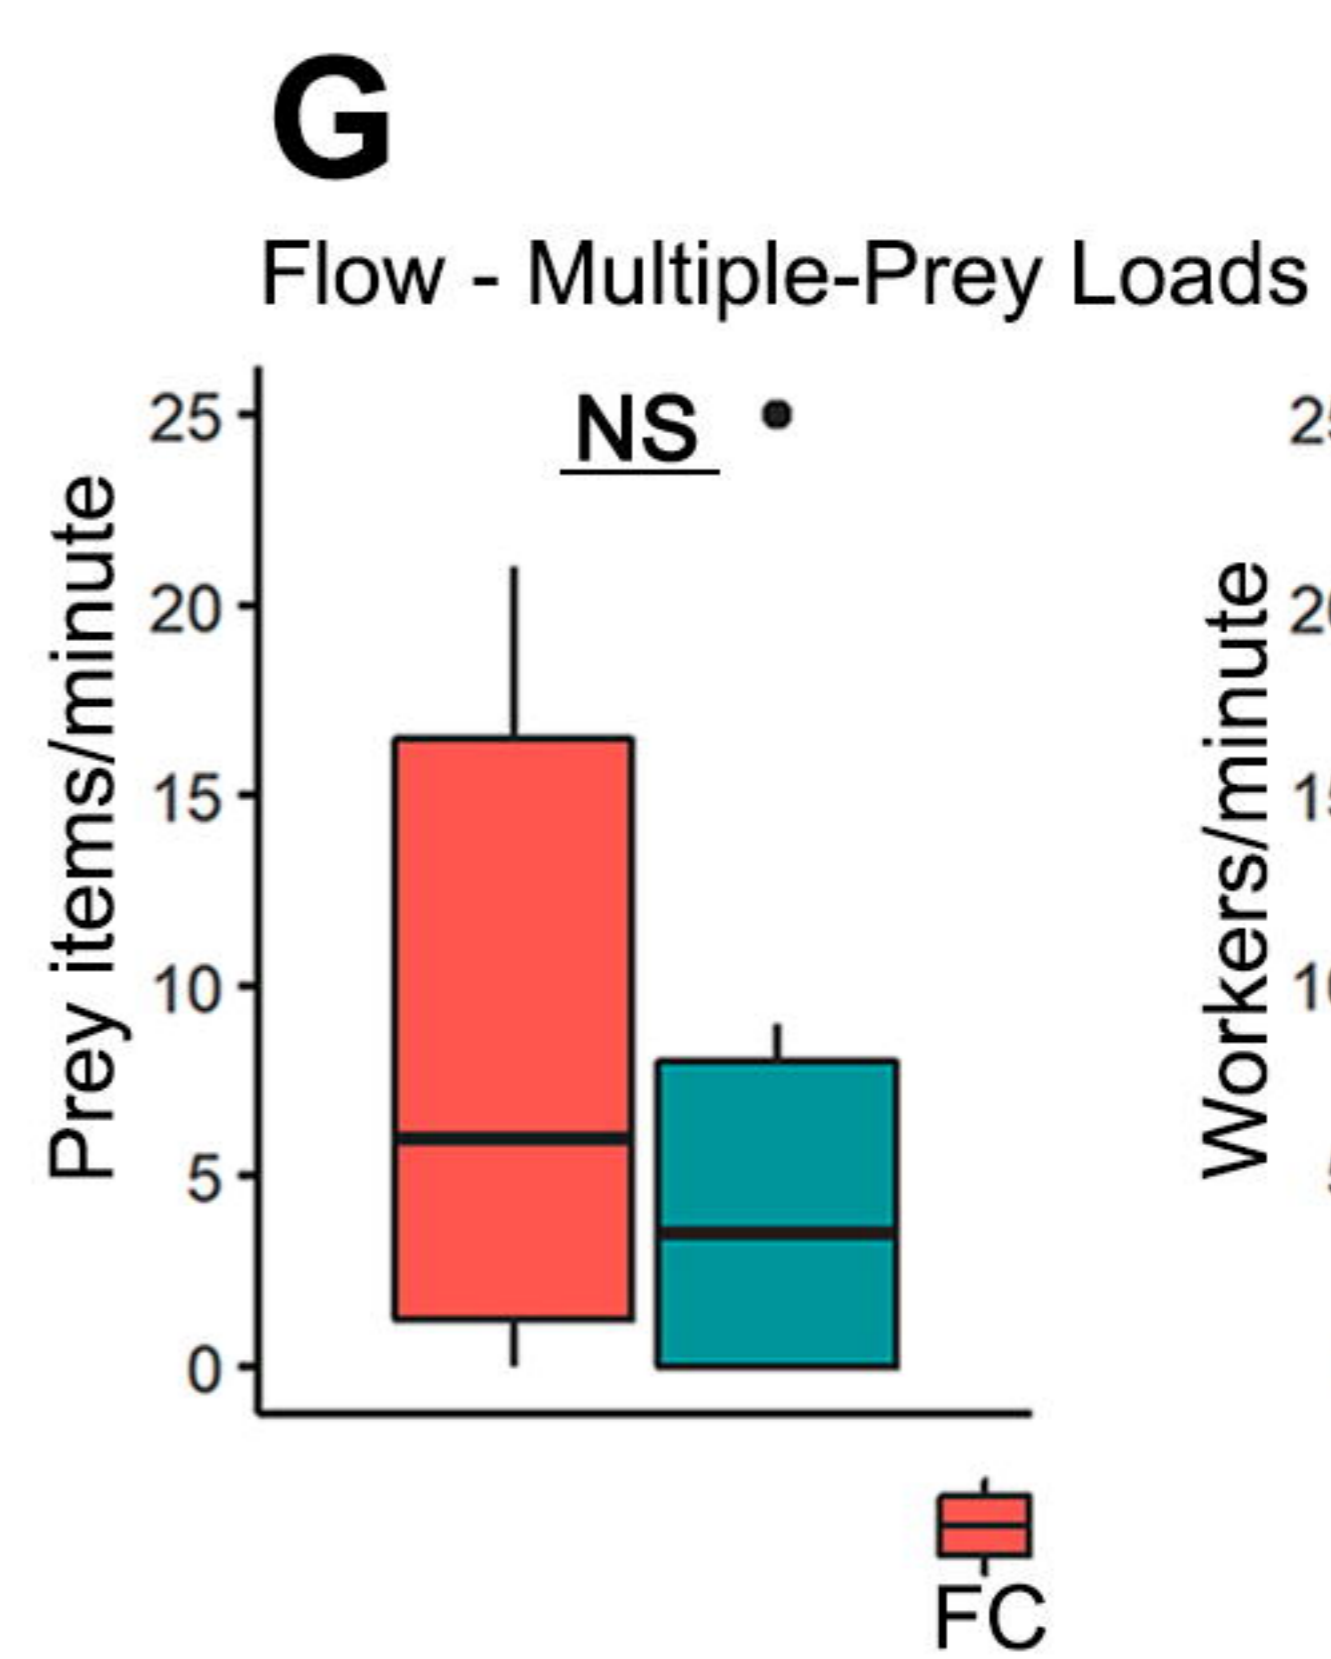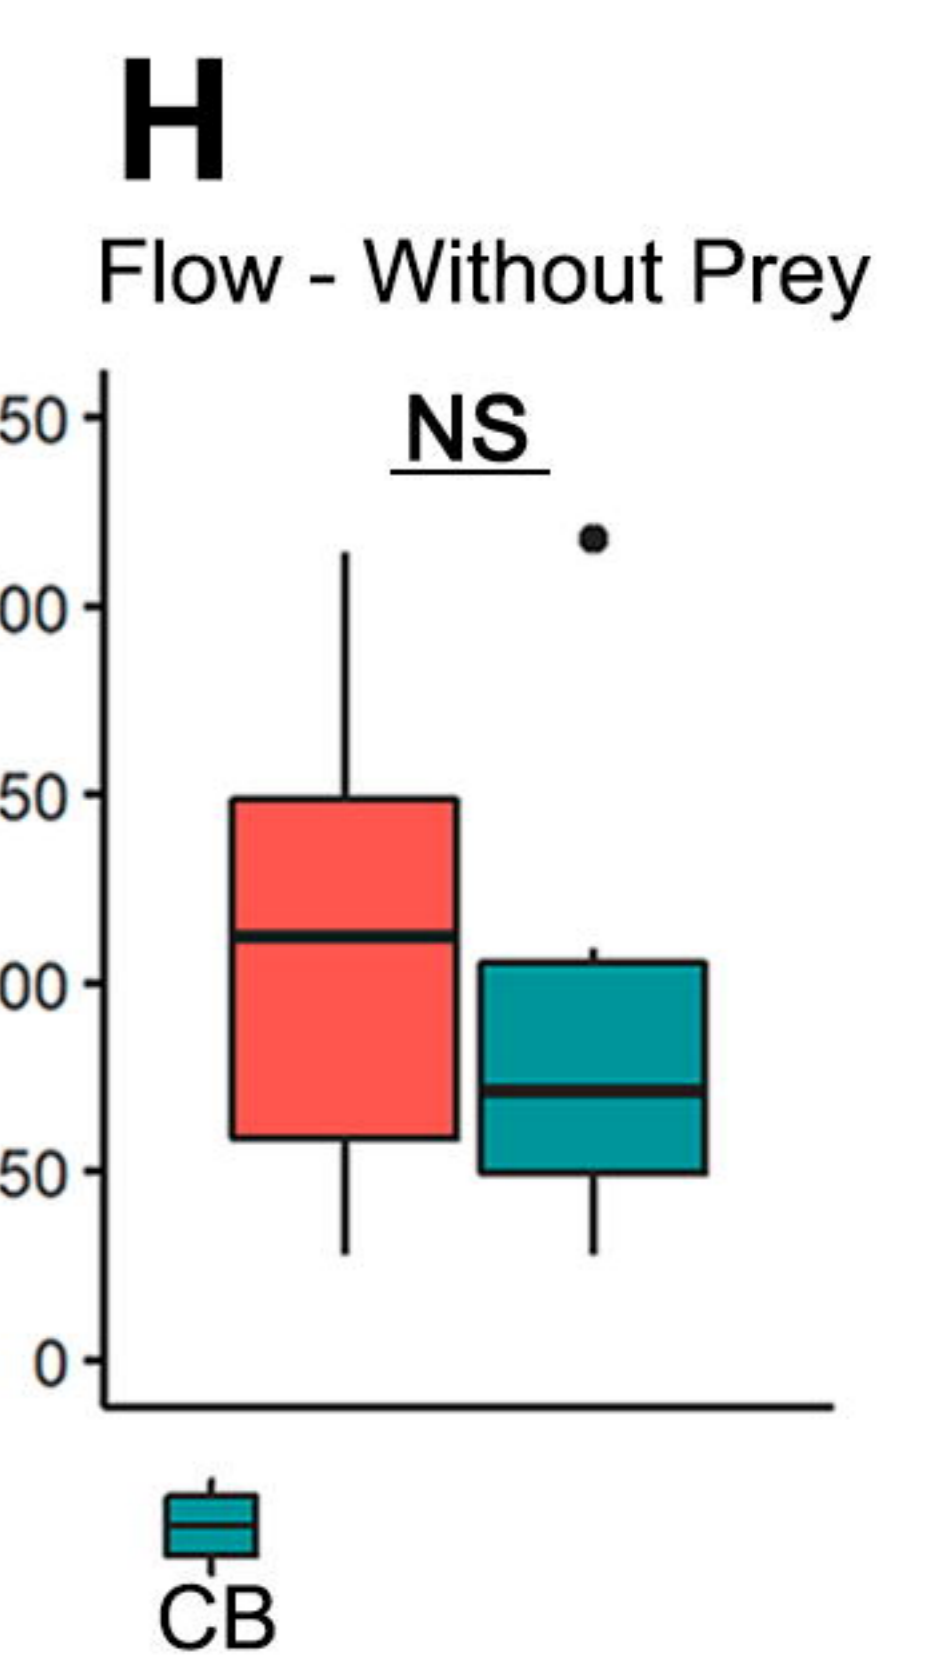



A. Probability to cache/collect cached food: 25%

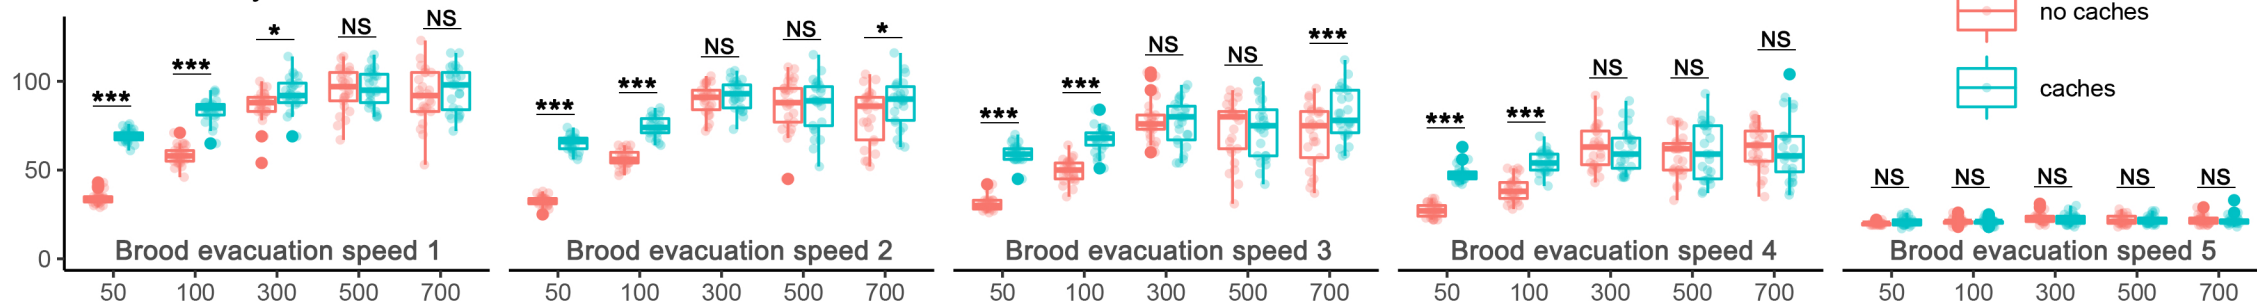

B. Probability to cache/collect cached food: 50%

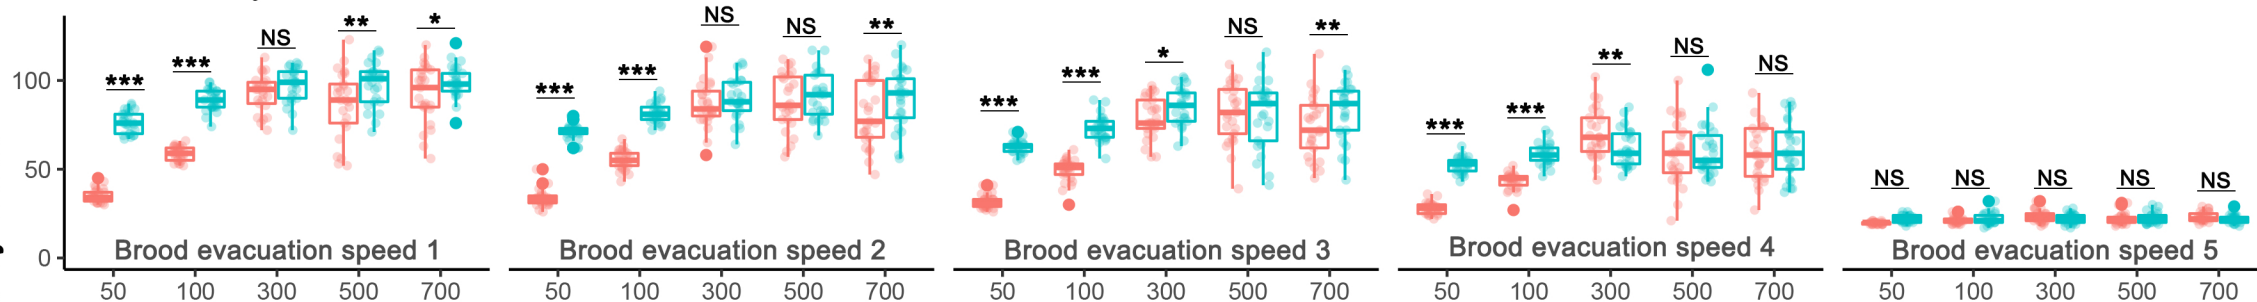

C. Probability to cache/collect cached food: 75%

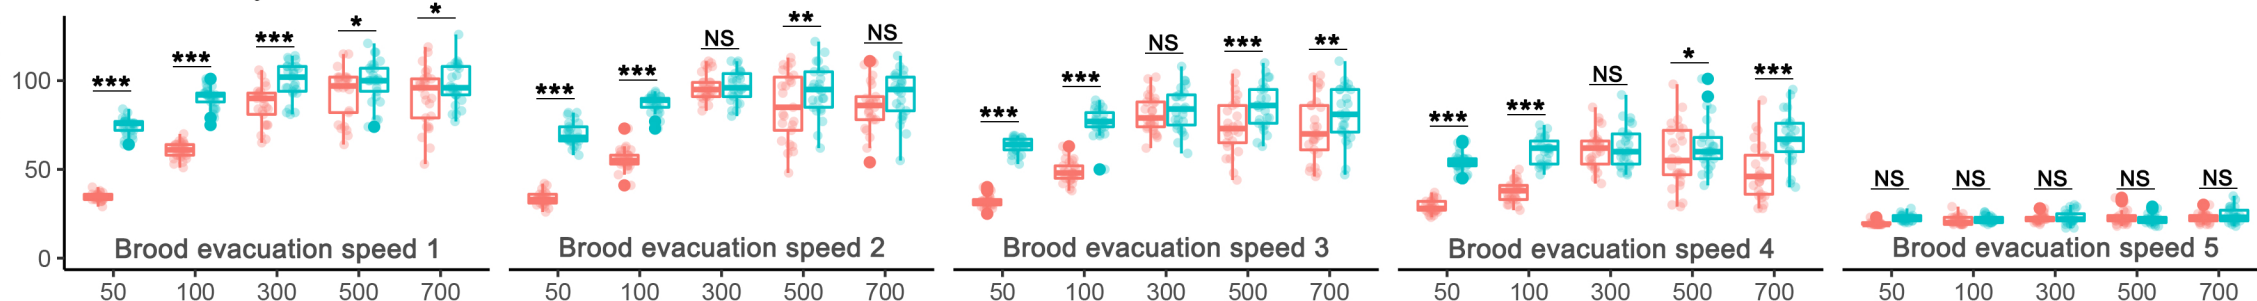

D. Probability to cache/collect cached food: 100%

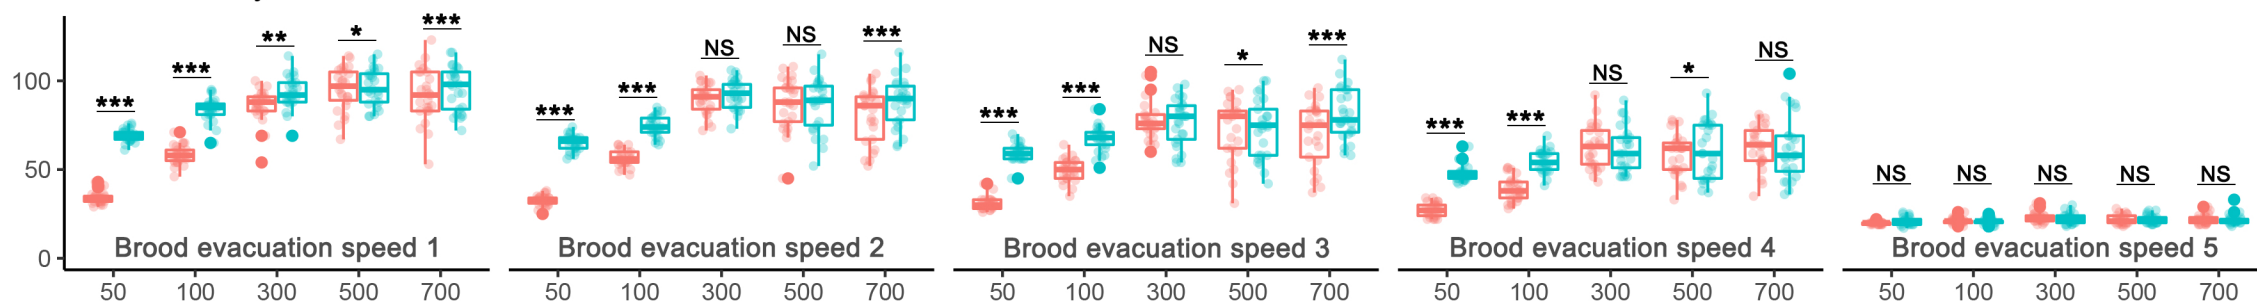

Number of raiders

| Model 1 - Prey retrieval                       | Estimate  | Std. error | t value  | p       |
|------------------------------------------------|-----------|------------|----------|---------|
| Intercept                                      | 3.987343  | 0.01107    | 360.197  | < 0.001 |
| brood evacuation speed 2                       | -0.061278 | 0.008446   | -7.255   | < 0.001 |
| brood evacuation speed 3                       | -0.17475  | 0.008704   | -20.078  | < 0.001 |
| brood evacuation speed 4                       | -0.402512 | 0.009289   | -43.333  | < 0.001 |
| brood evacuation speed 5                       | -1.311772 | 0.012765   | -102.764 | < 0.001 |
| Probability to cache/collect cached food: 50%  | 0.033392  | 0.008616   | 3.875    | < 0.001 |
| Probability to cache/collect cached food: 75%  | 0.040408  | 0.008601   | 4.698    | < 0.001 |
| Probability to cache/collect cached food: 100% | -0.016747 | 0.008724   | -1.92    | 0.054   |
| 100 raiders                                    | 0.280664  | 0.010991   | 25.535   | < 0.001 |
| 300 raiders                                    | 0.550067  | 0.010418   | 52.8     | < 0.001 |
| 500 raiders                                    | 0.516625  | 0.010482   | 49.285   | < 0.001 |
| 700 raiders                                    | 0.511538  | 0.010492   | 48.753   | < 0.001 |

| Model 2 - Probability to cache/collect cached food: 25% | Estimate  | Std. error | t value | p       |
|---------------------------------------------------------|-----------|------------|---------|---------|
| <b>Contrast: caches vs. no caches</b>                   |           |            |         |         |
| brood evacuation speed 1; 50 raiders                    | 0.711218  | 0.049514   | 14.364  | < 0.001 |
| brood evacuation speed 2; 50 raiders                    | 0.6913    | 0.050795   | 13.61   | < 0.001 |
| brood evacuation speed 3; 50 raiders                    | 0.658218  | 0.052418   | 12.557  | < 0.001 |
| brood evacuation speed 4; 50 raiders                    | 0.55878   | 0.056673   | 9.86    | < 0.001 |
| brood evacuation speed 5; 50 raiders                    | 0.055024  | 0.074133   | 0.742   | 0.45809 |
| brood evacuation speed 1; 100 raiders                   | 0.361802  | 0.040311   | 8.975   | < 0.001 |
| brood evacuation speed 2; 100 raiders                   | 0.281801  | 0.041745   | 6.75    | < 0.001 |
| brood evacuation speed 3; 100 raiders                   | 0.302281  | 0.044256   | 6.83    | < 0.001 |
| brood evacuation speed 4; 100 raiders                   | 0.336472  | 0.049444   | 6.805   | < 0.001 |
| brood evacuation speed 5; 100 raiders                   | -0.005753 | 0.073211   | -0.079  | 0.93738 |
| brood evacuation speed 1; 300 raiders                   | 0.079757  | 0.03531    | 2.259   | < 0.05  |
| brood evacuation speed 2; 300 raiders                   | 0.030299  | 0.035037   | 0.865   | 0.38734 |
| brood evacuation speed 3; 300 raiders                   | -0.017608 | 0.038048   | -0.463  | 0.6436  |
| brood evacuation speed 4; 300 raiders                   | 0.048053  | 0.042554   | 1.129   | 0.25773 |
| brood evacuation speed 5; 300 raiders                   | -0.001388 | 0.070919   | -0.019  | 0.98435 |
| brood evacuation speed 1; 500 raiders                   | 0.009605  | 0.034167   | 0.281   | 0.77866 |
| brood evacuation speed 2; 500 raiders                   | -0.008272 | 0.035841   | -0.231  | 0.81751 |
| brood evacuation speed 3; 500 raiders                   | 0.007149  | 0.039206   | 0.182   | 0.85535 |
| brood evacuation speed 4; 500 raiders                   | 0.052944  | 0.043291   | 1.223   | 0.22158 |
| brood evacuation speed 5; 500 raiders                   | -0.001837 | 0.071648   | -0.026  | 0.97955 |
| brood evacuation speed 1; 700 raiders                   | 0.041415  | 0.034551   | 1.199   | 0.2309  |
| brood evacuation speed 2; 700 raiders                   | 0.089328  | 0.036468   | 2.45    | < 0.05  |
| brood evacuation speed 3; 700 raiders                   | 0.151532  | 0.038557   | 3.93    | < 0.001 |
| brood evacuation speed 4; 700 raiders                   | -0.013553 | 0.042473   | -0.319  | 0.74971 |
| brood evacuation speed 5; 700 raiders                   | 0.00367   | 0.071615   | 0.051   | 0.95914 |

| Model 3 - Probability to cache/collect cached food: 50% | Estimate  | Std. error | t value | p        |
|---------------------------------------------------------|-----------|------------|---------|----------|
| <b>Contrast: caches vs. no caches</b>                   |           |            |         |          |
| brood evacuation speed 1; 50 raiders                    | 0.77319   | 0.051412   | 15.039  | < 0.001  |
| brood evacuation speed 2; 50 raiders                    | 0.732796  | 0.052618   | 13.927  | < 0.001  |
| brood evacuation speed 3; 50 raiders                    | 0.683021  | 0.054988   | 12.421  | < 0.001  |
| brood evacuation speed 4; 50 raiders                    | 0.628035  | 0.059201   | 10.609  | < 0.001  |
| brood evacuation speed 5; 50 raiders                    | 0.113474  | 0.078415   | 1.447   | 0.148129 |
| brood evacuation speed 1; 100 raiders                   | 0.412915  | 0.042449   | 9.727   | < 0.001  |
| brood evacuation speed 2; 100 raiders                   | 0.392355  | 0.043975   | 8.922   | < 0.001  |
| brood evacuation speed 3; 100 raiders                   | 0.394055  | 0.046522   | 8.47    | < 0.001  |
| brood evacuation speed 4; 100 raiders                   | 0.300105  | 0.050705   | 5.919   | < 0.001  |
| brood evacuation speed 5; 100 raiders                   | 0.04437   | 0.07681    | 0.578   | 0.563606 |
| brood evacuation speed 1; 300 raiders                   | 0.050905  | 0.036643   | 1.389   | 0.165026 |
| brood evacuation speed 2; 300 raiders                   | 0.029921  | 0.038033   | 0.787   | 0.431606 |
| brood evacuation speed 3; 300 raiders                   | 0.079926  | 0.039451   | 2.026   | < 0.05   |
| brood evacuation speed 4; 300 raiders                   | -0.125964 | 0.044119   | -2.855  | < 0.01   |
| brood evacuation speed 5; 300 raiders                   | -0.049219 | 0.0749     | -0.657  | 0.511226 |
| brood evacuation speed 1; 500 raiders                   | 0.117118  | 0.037242   | 3.145   | < 0.01   |
| brood evacuation speed 2; 500 raiders                   | 0.041114  | 0.037763   | 1.089   | 0.276494 |
| brood evacuation speed 3; 500 raiders                   | -0.007391 | 0.039648   | -0.186  | 0.852149 |
| brood evacuation speed 4; 500 raiders                   | 0.030813  | 0.046231   | 0.667   | 0.505218 |
| brood evacuation speed 5; 500 raiders                   | 0.012647  | 0.075921   | 0.167   | 0.867727 |
| brood evacuation speed 1; 700 raiders                   | 0.072964  | 0.036487   | 2       | < 0.05   |
| brood evacuation speed 2; 700 raiders                   | 0.09985   | 0.038613   | 2.586   | < 0.01   |
| brood evacuation speed 3; 700 raiders                   | 0.1072    | 0.04049    | 2.648   | < 0.01   |
| brood evacuation speed 4; 700 raiders                   | 0.035396  | 0.046163   | 0.767   | 0.443374 |
| brood evacuation speed 5; 700 raiders                   | -0.05311  | 0.075169   | -0.707  | 0.47999  |

| Model 4 - Probability to cache/collect cached food: 75% | Estimate  | Std. error | t value | p        |
|---------------------------------------------------------|-----------|------------|---------|----------|
| <b>Contrast: caches vs. no caches</b>                   |           |            |         |          |
| brood evacuation speed 1; 50 raiders                    | 0.770862  | 0.049487   | 15.577  | < 0.001  |
| brood evacuation speed 2; 50 raiders                    | 0.741026  | 0.050432   | 14.694  | < 0.001  |
| brood evacuation speed 3; 50 raiders                    | 0.687471  | 0.052173   | 13.177  | < 0.001  |
| brood evacuation speed 4; 50 raiders                    | 0.621586  | 0.055291   | 11.242  | < 0.001  |
| brood evacuation speed 5; 50 raiders                    | 0.145016  | 0.074259   | 1.953   | 0.051071 |
| brood evacuation speed 1; 100 raiders                   | 0.399499  | 0.039875   | 10.019  | < 0.001  |
| brood evacuation speed 2; 100 raiders                   | 0.442905  | 0.041127   | 10.769  | < 0.001  |
| brood evacuation speed 3; 100 raiders                   | 0.451911  | 0.043948   | 10.283  | < 0.001  |
| brood evacuation speed 4; 100 raiders                   | 0.479421  | 0.049855   | 9.616   | < 0.001  |
| brood evacuation speed 5; 100 raiders                   | 0.035221  | 0.073073   | 0.482   | 0.629892 |
| brood evacuation speed 1; 300 raiders                   | 0.144982  | 0.035261   | 4.112   | < 0.001  |
| brood evacuation speed 2; 300 raiders                   | 0.001654  | 0.034511   | 0.048   | 0.961777 |
| brood evacuation speed 3; 300 raiders                   | 0.030548  | 0.037371   | 0.817   | 0.413856 |
| brood evacuation speed 4; 300 raiders                   | 0.028298  | 0.043039   | 0.657   | 0.510995 |
| brood evacuation speed 5; 300 raiders                   | 0.003534  | 0.071331   | 0.05    | 0.960499 |
| brood evacuation speed 1; 500 raiders                   | 0.071459  | 0.034605   | 2.065   | < 0.05   |
| brood evacuation speed 2; 500 raiders                   | 0.094334  | 0.035824   | 2.633   | < 0.01   |
| brood evacuation speed 3; 500 raiders                   | 0.14346   | 0.038073   | 3.768   | < 0.001  |
| brood evacuation speed 4; 500 raiders                   | 0.106547  | 0.043697   | 2.438   | < 0.05   |
| brood evacuation speed 5; 500 raiders                   | -0.040678 | 0.071377   | -0.57   | 0.568856 |
| brood evacuation speed 1; 700 raiders                   | 0.070488  | 0.034984   | 2.015   | < 0.05   |
| brood evacuation speed 2; 700 raiders                   | 0.06809   | 0.03605    | 1.889   | 0.059165 |
| brood evacuation speed 3; 700 raiders                   | 0.100394  | 0.038637   | 2.598   | < 0.01   |
| brood evacuation speed 4; 700 raiders                   | 0.322321  | 0.045115   | 7.144   | < 0.001  |
| brood evacuation speed 5; 700 raiders                   | 0.050945  | 0.069947   | 0.728   | 0.466552 |

| Model 5 - Probability to cache/collect cached food: 100% | Estimate  | Std. error | t value | p        |
|----------------------------------------------------------|-----------|------------|---------|----------|
| <b>Contrast: caches vs. no caches</b>                    |           |            |         |          |
| brood evacuation speed 1; 50 raiders                     | 0.392413  | 0.056245   | 6.977   | < 0.001  |
| brood evacuation speed 2; 50 raiders                     | 0.360376  | 0.058843   | 6.124   | < 0.001  |
| brood evacuation speed 3; 50 raiders                     | 0.329286  | 0.058897   | 5.591   | < 0.001  |
| brood evacuation speed 4; 50 raiders                     | 0.341534  | 0.062102   | 5.5     | < 0.001  |
| brood evacuation speed 5; 50 raiders                     | 0.025872  | 0.081051   | 0.319   | 0.749625 |
| brood evacuation speed 1; 100 raiders                    | 0.232182  | 0.043803   | 5.301   | < 0.001  |
| brood evacuation speed 2; 100 raiders                    | 0.303544  | 0.045658   | 6.648   | < 0.001  |
| brood evacuation speed 3; 100 raiders                    | 0.320526  | 0.049065   | 6.533   | < 0.001  |
| brood evacuation speed 4; 100 raiders                    | 0.360469  | 0.054386   | 6.628   | < 0.001  |
| brood evacuation speed 5; 100 raiders                    | -0.001899 | 0.079176   | -0.024  | 0.980865 |
| brood evacuation speed 1; 300 raiders                    | 0.099653  | 0.037684   | 2.644   | < 0.01   |
| brood evacuation speed 2; 300 raiders                    | 0.062745  | 0.038473   | 1.631   | 0.10318  |
| brood evacuation speed 3; 300 raiders                    | -0.077686 | 0.039927   | -1.946  | 0.051925 |
| brood evacuation speed 4; 300 raiders                    | -0.025494 | 0.043733   | -0.583  | 0.560037 |
| brood evacuation speed 5; 300 raiders                    | 0.003704  | 0.07818    | 0.047   | 0.962223 |
| brood evacuation speed 1; 500 raiders                    | 0.074805  | 0.037579   | 1.991   | < 0.05   |
| brood evacuation speed 2; 500 raiders                    | 0.032652  | 0.039241   | 0.832   | 0.405518 |
| brood evacuation speed 3; 500 raiders                    | 0.091788  | 0.041756   | 2.198   | < 0.05   |
| brood evacuation speed 4; 500 raiders                    | 0.119578  | 0.048966   | 2.442   | < 0.05   |
| brood evacuation speed 5; 500 raiders                    | 0.056123  | 0.077321   | 0.726   | 0.468071 |
| brood evacuation speed 1; 700 raiders                    | 0.17942   | 0.038247   | 4.691   | < 0.001  |
| brood evacuation speed 2; 700 raiders                    | 0.161147  | 0.039754   | 4.054   | < 0.001  |
| brood evacuation speed 3; 700 raiders                    | 0.13893   | 0.041664   | 3.335   | < 0.001  |
| brood evacuation speed 4; 700 raiders                    | 0.030691  | 0.046428   | 0.661   | 0.508709 |
| brood evacuation speed 5; 700 raiders                    | 0.003559  | 0.076634   | 0.046   | 0.962969 |

| Model 6 - Time spent retrieving prey           | Estimate | Std. error | t value | p        |
|------------------------------------------------|----------|------------|---------|----------|
| Intercept                                      | 4.18616  | 0.03136    | 133.483 | < 0.001  |
| brood evacuation speed 2                       | -0.03542 | 0.02786    | -1.272  | 0.203595 |
| brood evacuation speed 3                       | -0.06278 | 0.02805    | -2.238  | < 0.05   |
| brood evacuation speed 4                       | -0.09426 | 0.02828    | -3.332  | < 0.001  |
| brood evacuation speed 5                       | -0.34247 | 0.0303     | -11.303 | < 0.001  |
| Probability to cache/collect cached food: 50%  | -0.02138 | 0.02575    | -0.831  | 0.406268 |
| Probability to cache/collect cached food: 75%  | -0.06035 | 0.026      | -2.321  | < 0.05   |
| Probability to cache/collect cached food: 100% | -0.02857 | 0.02579    | -1.108  | 0.268129 |
| 100 raiders                                    | -0.05383 | 0.03017    | -1.784  | 0.074455 |
| 300 raiders                                    | -0.09955 | 0.03053    | -3.26   | < 0.01   |
| 500 raiders                                    | -0.13098 | 0.03079    | -4.254  | < 0.001  |
| 700 raiders                                    | 0.42363  | 0.02707    | 15.648  | < 0.001  |

bioRxiv preprint doi: <https://doi.org/10.1101/2021.05.24.445418>; this version posted August 20, 2021. The copyright holder for this preprint (which was not certified by peer review) is the author/funder, who has granted bioRxiv a license to display the preprint in perpetuity. It is made available under aCC-BY-NC-ND 4.0 International license.
